# 1 **LotuS2: An ultrafast and highly accurate tool for amplicon sequencing analysis**

2 Ezgi Özkurt<sup>1,2</sup>, Joachim Fritscher<sup>1,2</sup>, Nicola Soranzo<sup>2</sup>, Duncan Y. K. Ng<sup>1</sup>, Robert P. Davey<sup>2</sup>

3 Mohammad Bahram<sup>3,4</sup>, Falk Hildebrand<sup>1,2,#</sup>

4 <sup>1</sup> Gut Microbes & Health, Quadram Institute Bioscience, Norwich Research Park, Norwich,  
5 Norfolk, NR4 7UQ, UK

6 <sup>2</sup> Earlham Institute, Norwich Research Park, Norwich, Norfolk, NR4 7UZ, UK

7 <sup>3</sup> Department of Ecology, Swedish University of Agricultural Sciences, Uppsala, Ulls väg 16, 756  
8 51 Sweden

9 <sup>4</sup> Institute of Ecology and Earth Sciences, University of Tartu, Tartu, 40 Lai St. Estonia

10 # Corresponding author: [falk.hildebrand@quadram.ac.uk](mailto:falk.hildebrand@quadram.ac.uk)

11

## 12 **Abstract**

13 **Background:** Amplicon sequencing is an established and cost-efficient method for profiling  
14 microbiomes. However, many available tools to process this data require both bioinformatics  
15 skills and high computational power to process big datasets. Furthermore, there are only few  
16 tools that allow for long read amplicon data analysis. To bridge this gap, we developed the  
17 LotuS2 (Less OTU Scripts 2) pipeline, enabling user-friendly, resource friendly, and versatile  
18 analysis of raw amplicon sequences.

19

20 **Results:** In LotuS2, six different sequence clustering algorithms as well as extensive pre- and  
21 post-processing options allow for flexible data analysis by both experts, where parameters can  
22 be fully adjusted, and novices, where defaults are provided for different scenarios.

23 We benchmarked three independent gut and soil datasets, where LotuS2 was on average 29  
24 times faster compared to other pipelines - yet could better reproduce the alpha- and beta-  
25 diversity of technical replicate samples. Further benchmarking a mock community with known  
26 taxa composition showed that, compared to the other pipelines, LotuS2 recovered a higher  
27 fraction of correctly identified genera and species (98% and 57%, respectively). At ASV/OTU  
28 level, precision and F-score were highest for LotuS2, as was the fraction of correctly  
29 reconstructed 16S sequences.

30 **Conclusion:** LotuS2 is a lightweight and user-friendly pipeline that is fast, precise and  
31 streamlined. High data usage rates and reliability enable high-throughput microbiome analysis  
32 in minutes.

33

34 **Availability:** LotuS2 is available from GitHub, conda or via a Galaxy web interface, documented  
35 at <http://lotus2.earlham.ac.uk/>.

36

37 **Keywords:** microbiome, short read sequencing, amplicon data analysis, 16S rRNA, ITS

38

## 39 **BACKGROUND:**

40 The field of microbiome research has been revolutionized in the last decade, owing to  
41 methodological advances in DNA-based microbial identification. Amplicon sequencing (also  
42 known as metabarcoding) is one of the most commonly used techniques to profile microbial

43 communities based on targeting and amplifying phylogenetically conserved genomic regions  
44 such as the 16S/18S ribosomal RNA (rRNA) or internal transcribed spacers (ITS) for  
45 identification of bacteria and eukaryotes (esp. Fungi), respectively [1,2]. The popularity of  
46 amplicon sequencing has been growing due to its broad applicability, ease-of-use, cost-  
47 efficiency, streamlined analysis workflows as well as specialist applications such as low  
48 biomass sampling [3].

49  
50 Alas, amplicon sequencing comes with several technical challenges. These include primer  
51 biases [4], chimeras occurring in PCR amplifications [5], rDNA copy number variations [6] and  
52 sequencing errors that frequently inflate observed diversity [7]. Although modern read error  
53 corrections can significantly decrease artifacts of sequencing errors [8], the taxonomic  
54 resolution is limited to the genus or at best to species level [9,10]. To process amplicon  
55 sequencing data from raw reads to taxa abundance tables, several pipelines have been  
56 developed, such as mothur [11], QIIME 2 [12], DADA2 [8] or LotuS [13]. These pipelines differ in  
57 their data processing and sequence clustering strategies, reflected in differing execution speed  
58 and resulting amplicon interpretations [13,14].

59  
60 Here we introduce Lotus2, designed to improve reproducibility, accuracy and ease of amplicon  
61 sequencing analysis. LotuS2 offers a completely refactored installation, including a web  
62 interface that is freely deployable on Galaxy clusters. During development, we focused on all  
63 steps of amplicon data analysis, including processing raw reads to abundance tables as well as  
64 improving taxonomic assignments and phylogenies of Operational Taxonomic Units (OTUs) or  
65 Amplicon Sequencing Variants (ASVs) at the highest quality with the latest strategies available.  
66 Pre- and post-processing steps were further improved compared to the predecessor “LotuS1”:  
67 the read filtering program sdm (simple demultiplexer) and taxonomy calculation program LCA  
68 (least common ancestor) were refactored and parallelized in C++. LotuS2 uses a ‘seed

69 extension' algorithm that improves the quality and length of OTU/ASV representative DNA  
70 sequences. We integrated numerous features such as additional sequence clustering options  
71 (DADA2, UNOISE3, VSEARCH and CD-HIT), advanced read quality filters based on  
72 probabilistic and Poisson binomial filtering and curated ASVs/OTUs diversity and abundances  
73 (LULU, UNCROSS2, ITSx, host DNA filters). LotuS2 can also be integrated in complete  
74 workflows, e.g. the microbiome visualization-centric pipeline CoMA [15] uses LotuS1/2 at its  
75 core to estimate taxa abundances.  
76 Here, we evaluated LotuS2 in reproducing microbiota profiles in comparison to contemporary  
77 amplicon sequencing pipelines. We found that LotuS2 consistently reproduces microbiota  
78 profiles more accurately, using three independent datasets, and reconstructs a mock community  
79 with the highest overall precision.

80

## 81 **MATERIALS AND METHODS:** 82 **Design Philosophy of LotuS2**

83 Overestimating observed diversity is one of the central problems in amplicon sequencing,  
84 mainly due to sequencing errors [7,16]. The second read pair from Illumina paired-end  
85 sequencing is generally lower in quality [17] and can contain more errors than predicted from  
86 Phred quality scores alone [18,19]. Additionally, merging reads can introduce chimeras due to  
87 read pair mismatches [20]. The accumulation of errors over millions of read pairs can impact  
88 observed biodiversity, so essentially is a multiple testing problem. To avoid overestimating  
89 biodiversity, LotuS2 uses a relatively strict read filtering during the error-sensitive sequence  
90 clustering step. This is based on i) 21 quality filtering metrics (average quality, homonucleotide  
91 repeats, removal of reads without amplicon primers, etc), ii) probabilistic and Poisson binomial  
92 read filtering [17,21], iii) filtering reads that cannot be dereplicated (clustered at 100% nucleotide  
93 identity) either within or between samples and iv) using only the first read pair from paired-end  
94 Illumina sequencing platforms. These reads are termed "high-quality" reads in the pipeline

95 description and are clustered into OTUs/ASVs, using one of the sequence clustering programs  
96 **(Figure 1B).**

97 However, filtered out “mid-quality” sequences are partly recovered later in the pipeline, during  
98 the seed extension step. LotuS2 will reintroduce reads failing dereplication thresholds or being  
99 of “mid-quality” by mapping these reads back onto high-quality OTUs/ASVs if matching at  $\geq$   
100 97% sequence identity. In the “seed extension” step, the optimal sequence representing each  
101 OTU/ASV is determined by comparing all (raw) reads clustered into each OTU/ASV. The best  
102 read (pair) is then selected based on the highest overall similarity to the consensus OTU/ASV,  
103 quality and length that, in the case of paired read data, can then be merged. Thereby, the seed  
104 extension step enables more reads to be included in taxa abundance estimates, as well as  
105 enabling longer ASV/OTU representative sequences to be used during taxonomic classifications  
106 and the reconstruction of a phylogenetic tree.

107

108

## 109 **Implementation of LotuS2**

110 **Installation** - LotuS2 can be accessed either through major software repositories such as i)  
111 Bioconda, ii) as a Docker image or iii) GitHub (accessible through <http://lotus2.earlham.ac.uk/>)

112 **(Figure 1A).** The GitHub version comes with an installer script that downloads the required  
113 databases and installs and configures LotuS2 with its dependencies. Alternatively, we provide  
114 iv) a wrapper for Galaxy [22] allowing installation of LotuS2 on any Galaxy server from the  
115 Galaxy ToolShed. LotuS2 is already available to use for free on the UseGalaxy.eu server  
116 (<https://usegalaxy.eu/>), where raw reads can be uploaded and analysed **(Supp. Figure 1).**

117 While LotuS2 is natively programmed for Unix (Linux, macOS) systems, other operating  
118 systems are supported through the Docker image or the Galaxy web interface.

119 **Input** - LotuS2 is designed to run with a single command, where the only essential flags are the  
120 path to input files (fastq(.gz), fna(.gz) format), output directory and mapping file. The mapping

121 file contains information on sample identifiers, demultiplexing barcodes or file paths to already  
122 demultiplexed files and can be either automatically generated or provided by the user. The  
123 sequence input is flexible, allowing simultaneous demultiplexing of read files and/or integration  
124 of already demultiplexed reads.

125 LotuS2 is highly configurable, enabling user-specific needs beyond the well-defined defaults.

126 There are 63 flags that can be user-modified, including dereplication filtering thresholds (-  
127 derepMin), sequencing platform (-p), amplicon region (-amplicon\_type), or OTU/ASV  
128 postprocessing (e.g. -LULU option to remove erroneous OTUs/ASVs [23]). In addition, read  
129 filtering criteria can be controlled in 32 detailed options via custom config files (defaults are  
130 provided for Illumina MiSeq, hiSeq, novaSeq, Roche 454, PacBio HiFi).

131

132 **Output** - The primary output is a set of tab-delimited OTU/ASV count tables, the phylogeny of  
133 OTUs/ASVs, their taxonomic assignments and corresponding abundance tables at different  
134 taxonomic levels. These are summarized in .biom [24] and phyloseq objects [25], that can be  
135 loaded directly by other software for downstream analysis.

136 Furthermore, a detailed report of each processing step can be found in the log files which  
137 contain commands of all used programs (including citations and versions) with relevant  
138 statistics. We support and encourage users to conduct further analysis in statistical  
139 programming languages such as R, Python or Matlab and using analysis packages such as  
140 phyloseq [25], documented in tutorials at <http://lotus2.earlham.ac.uk/>. .

141

142 **Pipeline workflow** - Most of LotuS2 is implemented in PERL 5.1; computational or memory  
143 intensive components like simple demultiplexer (sdm) and LCA (least common ancestor) are  
144 implemented in C++ (see **Figure 1B** for pipeline workflow). Demultiplexing, quality filtering and

145 dereplication of reads is implemented in sdm. Taxonomic postprocessing is implemented in  
146 LCA. Six sequence clustering methods are available: UPARSE [17], UNOISE3 [26], CD-HIT  
147 [27], SWARM [28], DADA2 [8] or VSEARCH [29].  
148 In the “seed extension” step, a unique representative read of a sequence cluster is chosen,  
149 based on quality and merging statistics. Each sequence cluster, termed ASVs in the case of  
150 DADA2, OTUs otherwise<sup>1</sup>, is represented by a high confidence DNA sequence (see Design  
151 Philosophy of LotuS2 for more information).  
152 OTUs/ASVs are further postprocessed to remove chimeras, either *de novo* and/or reference  
153 based using the program UCHIME3 [30] or VSEARCH-UCHIME [29]. By default, ITS sequences  
154 are extracted using ITSx [31]. Highly resolved OTUs/ASVs are then curated based on sequence  
155 similarity and co-occurrence patterns, using LULU [23]. False-positive OTU/ASV counts can be  
156 filtered using the UNCROSS2 algorithm [32]. OTUs/ASVs are by default aligned against the  
157 phiX genome, a synthetic genome often included in Illumina sequencing runs, using Minimap2  
158 [33]; these OTUs/ASVs are subsequently removed. Additionally, the user can filter for host  
159 contamination by providing custom genomes (e.g., human reference), as host genome reads  
160 are often misclassified as bacterial 16S by existing pipelines [3].  
161 Each OTU/ASV is taxonomically classified, using either RDP classifier [34], SINTAX [35] or by  
162 alignments to reference database(s), using the custom “LCA” (least common ancestor) C++  
163 program. Alignments of OTUs/ASVs with either Lambda [36], BLAST [37], VSEARCH [29], or  
164 USEARCH [38] are compared against a user-defined range of reference databases. These  
165 databases cover the 16S, 18S, 23S, 28S rRNA gene and ITS region, by default a Lambda  
166 alignment against the SILVA database is used [39]. Other databases bundled with LotuS2  
167 include Greengenes [40], HITdb [41], PR2 [42], beetax (bee gut-specific taxonomic annotation)  
168 [43], UNITE (fungal ITS database) [44], or users can provide reference databases (a fasta file

---

<sup>1</sup> Note that UNOISE3 uses the term zero-range OTUs (zOTUs); for brevity, this is omitted throughout the text.

169 and a tab-delimited taxonomy file). These databases can be used by themselves, or in  
170 conjunction. From mappings against one or several reference databases, the least common  
171 ancestor for each OTU/ASV is calculated using LCA. Priority is given to deeply resolved  
172 taxonomies, sorted by the earlier listed reference databases. For reconstructing phylogenetic  
173 trees, multiple sequence alignments for all OTUs/ASVs are calculated with either MAFFT [45] or  
174 Clustal  $\Omega$  [46]; from these a maximum likelihood phylogeny is constructed using either fasttree2  
175 [47] or IQ-TREE 2 [48].

176

177

## 178 **Benchmarking amplicon sequencing pipelines**

179 To benchmark the computational performance and reproducibility, we compared LotuS2's  
180 performance to commonly used amplicon sequencing pipelines including mothur [11], DADA2  
181 [8], and QIIME 2 [12]. We relied, where possible, on default options or standard operating  
182 procedure (SOPs) provided by the respective developers (mothur:  
183 [https://mothur.org/wiki/miseq\\_sop/](https://mothur.org/wiki/miseq_sop/); QIIME 2: [https://docs.qiime2.org/2021.11/tutorials/moving-](https://docs.qiime2.org/2021.11/tutorials/moving-pictures/)  
184 [pictures/](https://docs.qiime2.org/2021.11/tutorials/moving-pictures/) and DADA2: <https://benjineb.github.io/dada2/tutorial.html>). DADA2 cannot demultiplex  
185 raw reads and in these cases, LotuS2 demultiplexed raw reads were used as DADA2 input.

186 Our benchmarking scripts are available at [https://github.com/ozkurt/lotus2\\_benchmarking](https://github.com/ozkurt/lotus2_benchmarking) (see  
187 **Supp. Text**). Several sequence cluster algorithms were benchmarked, for LotuS2: DADA2 [8],  
188 UPARSE [17], UNOISE3 [26], CD-HIT [27] and VSEARCH [29]; for QIIME 2: DADA2 and  
189 Deblur [49]; DADA2 supporting natively only DADA2 clustering; for mothur: OptiClust; and for  
190 LotuS1: UPARSE. For taxonomic classification, SILVA138.1 [39], was used in all pipelines.

191 ITS amplicons are clustered with CD-HIT, UPARSE and VSEARCH and filtered by default using  
192 ITSx [31] in LotuS2. ITSx identifies likely ITS1, 5.8S and ITS2 and full-length ITS sequences,

193 and sequences not within the confidence interval are discarded in LotuS2. In analogy, QIIME 2-  
194 DADA2 uses q2-ITSxpress [50] that also removes unlikely ITS sequences.

195

196 Error profiles during ASV clustering were inferred separately for the samples sequenced in  
197 different MiSeq runs during DADA2 and Deblur clustering in all pipelines. We truncated the  
198 reads into the same length (200 bases, default by LotuS2) in all pipelines while analysing the  
199 datasets. Primers were removed from the reads, where supported by a pipeline.

200

### 201 **Measuring computational performance of amplicon sequencing pipelines**

202 When benchmarking pipelines, processing steps were separated into 5 categories in each  
203 tested pipeline: a) Pre-processing (demultiplexing if required, read filtering, primer removal and  
204 read merging for QIIME 2-Deblur), b) sequence clustering (clustering + refining of the clusters  
205 and denoising for QIIME 2-DADA2, c) OTU/ASV taxonomic assignment, d) construction of a  
206 phylogenetic tree (the option is available only in mothur, QIIME 2 and LotuS2) and e) removal of  
207 host genome (the option is available only in QIIME 2 and LotuS2). In mothur, sequence  
208 clustering and taxonomic assignment times were added since these pipeline commands are  
209 entangled ([https://mothur.org/wiki/miseq\\_sop/](https://mothur.org/wiki/miseq_sop/)).

210

### 211 **Data used in benchmarking pipeline performance**

212 Four datasets with different sample characteristics (e.g., compositional complexity, target gene  
213 and region, amplicon length) were analysed: i) Gut-16S dataset [13]: 16S rRNA gene amplicon  
214 sequencing of 40 human faecal samples in technical replicates that were sequenced in separate  
215 MiSeq runs, totalling 35,412,313 paired-end reads. Technical replicates were created by  
216 extracting DNA twice from each faecal sample. Since the Illumina runs were not demultiplexed,  
217 pipelines had to demultiplex these sequences, if available. ii) Soil-16S dataset: 16S rRNA gene  
218 amplicon sequencing of two technical replicates (single DNA extraction per sample) from 50 soil



219 samples, that were sequenced in separate MiSeq runs, totalling 11,820,327 paired-end reads.  
220 PCR reactions were conducted using the 16S rRNA region primers 515F  
221 (GTGYCAGCMGCCGCGGTAA) and 926R (GGCCGYCAATTYMTTTRAGTTT). The soil-16S  
222 dataset was already demultiplexed, requiring pipelines to work with paired FASTQ files per  
223 sample. iii) Soil-ITS dataset: ITS amplicon sequencing of 50 technical replicates of soil samples  
224 (single DNA extraction per sample), sequenced in two independent Illumina MiSeq runs,  
225 totalling 6,006,089 paired-end reads. ITS region primers gITS7ngs\_201  
226 (GGGTGARTCATCRARTYTTTG) and ITS4ngsUni\_201 (CCTSCSCTTANTDATATGC) [51]  
227 were used to amplify DNA extracted from soil samples. The soil-ITS dataset was already  
228 demultiplexed.

229 iv) Mock dataset [52]: A microbial mock community with known species composition, *mock-16*  
230 [52]. The mock dataset comprised a total of 59 strains of Bacteria and Archaea, representing 35  
231 bacterial and 8 archaeal genera. The mock community was sequenced on an Illumina MiSeq  
232 (paired-end) by targeting the V4 region of the 16S rRNA gene using the primers 515F  
233 (GTGCCAGCMGCCGCGGTAA) and 806R (GGACTIONVGGGTWTCTAAT) [52]. This dataset  
234 was demultiplexed and contained 593,868 paired reads.

### 235 **Benchmarking the computational performance of amplicon sequencing pipelines**

236 To evaluate the computational performance of LotuS2 in comparison to QIIME 2 [12], DADA2  
237 [8], and the last released version of LotuS [13] (v1.62 from Jan 2020; called LotuS1 here), all  
238 pipelines were run with 12 threads on a single computer free of other workloads (CPU: Intel(R)  
239 Xeon(R) Gold 6130 CPU @ 2.10 GHz, 32 cores, 375 GB RAM). To reduce the influence of  
240 network latencies on pipeline execution, all temporary, input, and output data were stored on a  
241 local SSD. Each pipeline was run three times consecutively to account for pre-cached data and  
242 to obtain average execution time and maximum memory usage. To calculate the fold  
243 differences in execution speed between pipelines, the average time of all LotuS2 runs was

244 divided by average QIIME 2, mothur and DADA2, where used in each of the three non-mock  
245 datasets. The average of these numbers was used to estimate the average speed advantage of  
246 LotuS2.

247

## 248 **Benchmarking reproducibility of amplicon sequencing pipelines**

249 Technical replicates of the soil and gut samples were used to estimate the reproducibility of the  
250 microbial community composition between replicates. This was measured by calculating beta  
251 and alpha diversity differences between technical replicate samples. To calculate beta diversity,  
252 either Jaccard (measuring presence/absence of OTUs/ASVs) or Bray-Curtis dissimilarity  
253 (measuring both presence/absence and abundances of OTUs/ASVs) were computed between  
254 technical replicate samples. Before computing Bray-Curtis distances, abundance matrices were  
255 normalized. Jaccard distances between samples were calculated by first rarefying abundance  
256 matrices to an equal number of reads (to the size of the first sample having > 1000 read counts)  
257 per sample using RTK [53]. Significance of pairwise comparisons of the pipelines in beta  
258 diversity differences was calculated using the ANOVA test where Tukey's HSD (honest  
259 significant differences) test was used as a *post hoc* test in R.  
260 To calculate alpha diversity, abundance data were first rarefied to an equal number of reads per  
261 sample. Significance of each pairwise comparison in alpha diversity was calculated based on a  
262 paired Wilcoxon test, pairing technical replicates.

263

## 264 **Analysis of the mock community**

265 We used an already sequenced mock community [52] of known relative composition and with  
266 sequenced reference genomes available. Firstly, taxonomic abundance tables (taxonomic  
267 assignments based on SILVA 138.1 [39] in all pipelines) were compared to the expected  
268 taxonomic composition of the sequenced mock community. Precision was calculated as  
269  $(TP/(TP+FP))$ , recall as  $(TP/(TP+FN))$  and F-score as  $(2*precision*recall/(precision+recall))$ , TP

270 (true positive) being taxa present in the mock and correctly identified as present, FN (false  
271 negative) being taxa present in the mock but not identified as present and FP (false positive)  
272 being taxa absent in the mock but identified as present. The fraction of read counts assigned to  
273 true positive taxa was calculated based on the sum of the relative abundance of all true positive  
274 taxa. These scores were calculated at different taxonomic levels.

275 Secondly, we investigated the precision of reconstructed 16S rRNA nucleotide sequences,  
276 representing each OTU or ASV, by calculating the nucleotide similarity between ASVs/OTUs  
277 and the known reference 16S rRNA sequences. To obtain the nucleotide similarity, we aligned  
278 ASV/OTU DNA sequences from tested pipelines via BLAST to a custom reference database  
279 that contained the 16S rRNA gene sequences from the mock community  
280 ([https://github.com/caporaso-lab/mockrobiota/blob/master/data/mock-16/source/expected-](https://github.com/caporaso-lab/mockrobiota/blob/master/data/mock-16/source/expected-sequences.fasta)  
281 [sequences.fasta](https://github.com/caporaso-lab/mockrobiota/blob/master/data/mock-16/source/expected-sequences.fasta)), using the `-taxOnly` option from LotuS2. The BLAST % nucleotide identity was  
282 subsequently used to calculate the best matching 16S rRNA sequence per ASV/OTU.

283

284

## 285 **RESULTS**

286 We analysed four datasets to benchmark the computational performance and reliability of the  
287 pipelines. The datasets consisted either of technical replicates (gut-16S, soil-16S, soil-ITS) or a  
288 mock community. Technical replicates were used to evaluate the reproducibility of community  
289 structures and were chosen to represent different biomes (gut, soil), using different 16S rRNA  
290 amplicon primers (gut-16S, soil-16S) or ITS sequences (soil-ITS) as well as a synthetic mock  
291 community of known composition.

292

### 293 **Computational performance and data usage**

294 The complete analysis of the gut-16S dataset was fastest in LotuS2 (on average 35, 12, 9 and  
295 3.8 times faster than mothur, QIIME 2-DADA2, QIIME 2-DEBLUR and native DADA2,

296 respectively, **Figure 2A**). Note that DADA2 could not demultiplex the dataset, the average of  
297 LotuS2 and QIIME2 demultiplexing times were used instead. LotuS2 was also faster in the  
298 analysis of the soil-16S dataset compared to the other tested pipelines (5.7, 3.5, 3.5 times faster  
299 than DADA2, QIIME 2-DADA2 and QIIME 2-DEBLUR, respectively, **Figure 2B**). The difference  
300 in speed between LotuS2 and QIIME 2 was more pronounced in the analysis of the soil-ITS  
301 dataset, where LotuS2 was on average 69 times faster than QIIME 2 and DADA2 (**Figure 2C**).  
302 LotuS2 also outperformed other pipelines in the case of the gut-16S dataset (on average  
303 LotuS2 was 15 times faster) compared to the soil dataset (average 4.2). This difference stems  
304 mainly from the demultiplexing step, where LotuS2 is significantly faster. The sequence  
305 clustering step was fastest using the UPARSE algorithm, i.e. an average 60-fold faster than  
306 sequence clustering in other pipelines. Averaged over these three datasets, LotuS2 was 29  
307 times faster than other pipelines.

308 Taxonomic classification of OTUs/ASVs was also faster in LotuS2 (~5 times faster for gut-16S,  
309 2 times for soil-16S). However, this strongly depends on the total number of OTUs/ASVs for all  
310 pipelines. For example, the default naïve-Bayes classifier [54] in QIIME 2 is faster relative to the  
311 number of OTUs/ASVs, compared to LotuS2 taxonomic assignments in this benchmark.

312 Nevertheless, the LotuS2 default taxonomic classification is via RDP classifier [34], and  
313 alternatively, the SINTAX [35] classifier could be used, both of which are significantly faster than  
314 the here presented Lambda LCA against the Silva reference database.

315 Compared to LotuS1, LotuS2 was on average 3.2 times faster, likely related to refactored C++  
316 programs that can take advantage of multiple CPU threads (**Figure 2A-B**).

317 In its fastest configuration (using “UPARSE” option in clustering, “RDP” to assign taxonomy), the  
318 gut and soil 16S rRNA datasets can be processed with LotuS2 in under 20 mins and 12 mins,  
319 using < 10 GB of memory and 4 CPU cores.

320 Despite using similar clustering algorithms (e.g. DADA2 is used in DADA2, QIIME 2 and  
321 LotuS2), the tested pipelines apply different pre- and post-processing algorithms to raw

322 sequence reads and clustered ASVs and OTUs, leading to differing ASV/OTU numbers and  
323 retrieved reads (the total read count in the ASV/OTU abundance matrix) (**Supp. Table 1 and**  
324 **Figure 2D-F**). DADA2 typically estimated the highest number of ASVs, but the number of  
325 retrieved reads varied strongly between datasets. QIIME 2-DADA2 estimated fewer ASVs than  
326 DADA2, but more ASVs than LotuS2-DADA2, although mapping fewer reads than LotuS2.  
327 Although retrieving a smaller number of reads, QIIME 2-Deblur reported comparable numbers of  
328 ASVs to LotuS2, despite the differences in clustering algorithms. mothur performed differently in  
329 the gut-16S and soil-16S datasets, where it estimated either the highest number of OTUs or  
330 could not complete the analysis since all the reads being filtered out, respectively. Overall,  
331 LotuS2 often reported the fewest ASVs/OTUs, while including more sequence reads in  
332 abundance tables. This indicates that LotuS2 has a more efficient usage of input data while  
333 covering a larger sequence space per ASV/OTU.

334

### 335 **Benchmarking the reproducibility of community compositions**

336 Next, we assessed the reproducibility of community compositions, using gut-16S, soil-16S and  
337 soil-ITS datasets comparing beta diversity between technical replicates (Bray Curtis distance,  
338 BCd and Jaccard distance, Jd). We found that Jd and BCd were the lowest in LotuS2, largely  
339 independent of the chosen sequence clustering algorithms and dataset. This indicates a greater  
340 reproducibility of community compositions generated by LotuS2 (**Figure 3A-B and Supp.**  
341 **Figure 2**). The lowest BCd and Jd were observed for UPARSE (**Figure 3A-B and Supp. Figure**  
342 **2**) in both gut- and soil-16S datasets, though this was not always significant between different  
343 LotuS2 runs (**Supp. Table 2**).

344 Even using the same clustering algorithm, LotuS2-DADA2 compositions were more  
345 reproducible, compared to both QIIME 2-DADA2 and DADA2 (significant only on soil data).  
346 LotuS2-DADA2 denoises by default all reads (per sequencing run) together, while in the default  
347 DADA2 setup each sample is separately denoised; the latter strategy has a reduced

348 computational burden but can potentially miss sequence information from rare bacteria. mothur  
349 showed poorer performance compared to other pipelines on the gut-16S dataset and did not  
350 complete on the soil data.

351 We then calculated the fraction of samples being closest in BCd distance to its technical  
352 replicate for each pipeline (**Figure 3D-E**), simulating the process of identifying technical  
353 replicates without prior knowledge. LotuS2 with UNOISE3 clustering resulted in the highest  
354 fraction of samples being closest to its replicate among all samples, in both gut- and soil-16S  
355 datasets while in the mothur result, technical replicates were the most unlikely to be closest to  
356 their technical replicate.

357 When this comparison was made with the non-default options in LotuS2 (using different  
358 dereplication parameters, deactivating LULU, using UNCROSS2 or retaining taxonomically  
359 unclassified reads), BCd between the technical replicates remained largely unchanged (**Supp.**  
360 **Figure 2, Supp. Figure 3A-B and Supp. Text**). However, retaining unclassified reads could  
361 significantly reduce the reproducibility of LotuS2 results on the gut-16S dataset. Furthermore,  
362 even starting the analysis with different read truncation lengths, LotuS2 still had the highest  
363 reproducibility in both gut- and soil-16S datasets (**Supp. Figure 4, Supp. Figure 5 and Supp.**  
364 **Text**).

365 Lastly, we calculated the reproducibility of reported alpha diversity between technical replicate  
366 samples in both gut-16S and soil-16S datasets (**Supp. Figure 6A-B**). In both datasets, LotuS2  
367 alpha diversity was not significantly different between technical replicates, as expected (5 of 8  
368 comparisons, Wilcoxon signed-rank test), whereas, in 6 of 6 cases, QIIME 2, mothur and  
369 DADA2 had significant differences in the alpha diversity between technical replicates.

370 Thus, LotuS2 showed in our benchmarks a higher data usage efficiency and higher  
371 reproducibility of community compositions than QIIME 2, DADA2 and mothur. These  
372 benchmarks also showed the importance of pre- and postprocessing raw reads and

373 OTUs/ASVs, since LotuS2-DADA2 and QIIME 2-DADA2 performed better than and DADA2,  
374 despite using the same clustering algorithm.

375

### 376 **Benchmarking soil-ITS dataset**

377 Unlike 16S rRNA gene amplicons, ITS amplicons typically vary greatly in length [4], requiring a  
378 different sequence clustering workflow; therefore, LotuS2 uses by default CD-HIT to cluster ITS  
379 sequences, and ITSx to identify plausible ITS1/2 sequences.

380 In terms of data usage, both LotuS2 and QIIME 2-DADA2 retrieved similar numbers of reads,  
381 but for QIIME 2 these read counts were distributed across twice the number of ASVs (**Figure**  
382 **2F**). QIIME 2-DADA2 reproduced the fungal composition significantly worse in replicate  
383 samples, compared to LotuS2-UPARSE, having higher pairwise BCd (**Figure 3C**) and Jd  
384 (**Supp. Figure 2H-I**). However, it spanned the highest fraction of samples closest to its technical  
385 replicate, although this fraction was overall very high for all the pipelines (0.978-1) (**Figure 3F**).  
386 DADA2 performed relatively worse, yielding the highest number of ASV, lowest retrieved read  
387 counts (**Figure 2F**), significantly the highest BCd (**Figure 3C, Suppl. Table 2**) between replicate  
388 samples. LotuS2 had overall the lowest BCd and Jd between replicates, using both UPARSE  
389 and CD-HIT clustering (**Figure 3C, Supp. Figure 2H-I**). Usage of CD-HIT in combination with  
390 ITSx led to an increase in OTU diversity (from 947 to 1008) although read counts remained  
391 mostly the same in the final output matrix and BCd was largely similar (**Supp. Figure 3C**). Here,  
392 deactivating LULU slightly decreased reproducibility (**Supp. Figure 3C**).

393 Finally, we calculated the reproducibility of alpha diversity between the technical replicate  
394 samples in the soil-ITS dataset (**Supp. Figure 6C**). All pipelines resulted in no significant  
395 difference between the technical replicate samples, thus alpha diversity was highly reproducible  
396 independent of the pipeline.

397

### 398 **Benchmarking the dataset from the mock microbial community**

399 To assess how well a known community can be reconstructed in LotuS2, we used a previously  
400 sequenced 16S mock community [52] containing 43 genera and 59 microbial strains, where  
401 complete reference genomes were available.

402 All pipelines performed poorly at reconstructing the community composition (Pearson  $R=0.43-$   
403  $0.67$ , Spearman  $Rho=0.54-0.80$ , **Supp. Table 3 and Supp. Figure 7**), possibly related to PCR  
404 biases and rRNA gene copy number variation. Therefore, we focused on the number of  
405 correctly identified taxa. For this, we calculated the number of reads assigned to true taxa as  
406 well as precision, recall and F-score at genus level. LotuS2-VSEARCH and LotuS2-UPARSE  
407 had the highest precision, F-score and fraction of reads assigned true positive taxa, (**Figure 4A**  
408 **and Supp. Figure 8**). LotuS1 had the highest recall, but low precision. When applying the same  
409 tests at species level, LotuS2-DADA2 had overall the highest precision and F-score (**Supp.**  
410 **Figure 9**). QIIME 2-DEBLUR had often competitive, but slightly lower, precision, recall and F-  
411 scores compared to LotuS2, while mothur, QIIME 2-DADA2 and DADA2 scores were lower  
412 (**Figure 4A**).

413 Next, we investigated which software could best reconstruct the correct OTU/ASV sequences.  
414 For this, we calculated the fraction of TP OTUs/ASVs (i.e., OTUs/ASVs which are assigned to a  
415 species based on the custom mock reference taxonomy) with 97%-100% nucleotide identity to  
416 16S rRNA sequences from reference genomes in each pipeline (**Figure 4B**). Here, LotuS2-  
417 VSEARCH and LotuS2-UPARSE reconstructed OTU sequences were most often identical to  
418 the expected sequences, having 82.2% of the OTU sequences reconstructed at 100%  
419 nucleotide identity to reference sequences. QIIME 2-Deblur ASV sequences were of similar  
420 quality, but slightly less often at 100% nucleotide identity (78.2%). DADA2 and QIIME 2-DADA2  
421 ASV sequences were often more dissimilar to the expected reference sequences. It is  
422 noteworthy that LotuS2-DADA2 did outperform these two pipelines based on the same  
423 sequence clustering algorithm, likely related to the stringent read filtering and seed extension  
424 step in LotuS2.



425 The mock community consisted of 49 bacteria and 10 archaea [52], with 128 16S rRNA gene  
426 copies included in their genomes. If multiple 16S copies occur within a single genome, these  
427 can diverge but are mostly highly similar or even identical to each other [55]. Thus, 59 OTUs  
428 would be the expected biodiversity, and  $\leq 128$  ASVs. Notably, the number of mothur and QIIME  
429 2-Deblur TP ASVs/OTUs exceeded this threshold (N=370, 198, respectively), both pipelines  
430 overestimate known biodiversity. DADA2 and QIIME 2-DADA2 generated more ASVs than  
431 expected per species (N=94, 122 respectively), but this might account for divergent within-  
432 genome 16S rRNA gene copies. LotuS2 was notably at the lower end in predicted biodiversity,  
433 predicting between 53-61 OTUs or ASVs in different clustering algorithms (**Supp. Table 4**).  
434 However, these seemed to mostly represent single species, covering the present species best  
435 among pipelines, as the precision at species level was highest for LotuS2 (**Supp. Figure 9**),  
436 thus capturing species level biodiversity most accurately.  
437 Based on the mock community data LotuS2 was more precise in reconstructing 16S rRNA gene  
438 sequences, assigning the correct taxonomy, detecting biodiversity, and within-genome 16S  
439 copies were less likely to be clustered separately using LotuS2.

440

## 441 **DISCUSSION**

442 LotuS2 offers a fast, accurate and streamlined amplicon data analysis with new features and  
443 substantial improvements since LotuS1. Software and workflow optimizations make LotuS2  
444 substantially faster than either QIIME 2, DADA2 and mothur. On large datasets, this advantage  
445 becomes crucial for users: for example, we processed a highly diverse soil dataset consisting of  
446 >11 million non-demultiplexed PacBio HiFi amplicons (26 Sequel II libraries) in 2.5 days on 16  
447 CPU cores, using a single command (unpublished data). Besides being more resource and  
448 user-friendly, compositional matrices from LotuS2 were more reproducible and accurate across  
449 all tested datasets (gut 16S, soil 16S, soil ITS, mock community 16S).

450 LotuS2 owes high reproducibility and accuracy to the efficient use of reads based on their  
451 quality tiers in different steps of the pipeline. Low-quality reads introduce noise and can  
452 artificially inflate observed biodiversity, i.e., the number of OTUs/ASVs [56]. Conversely, an  
453 overly strict read filter will decrease sensitivity for low-abundant members of a community by  
454 artificially reducing sequencing depth. To find a trade-off, LotuS2 uses only truncated, high-  
455 quality reads for sequence clustering (except ITS amplicons), while the read backmapping and  
456 seed extension steps restore some of the discarded sequence data.  
457 Notably, OTU/ASV reconstructed with LotuS2 were the most similar (at >99% identity) to the  
458 reference, compared to other pipelines (**Figure 4B**). This was mostly independent of clustering  
459 algorithms used, a combination of both selecting high-quality reads for sequence clustering and  
460 the seed extension step, that selects a high-quality read (pair) best representing each OTU or  
461 ASV. Seed extension also decouples read clustering and read merging, avoiding the use of the  
462 error-prone 3' read end or second read pair during the error sensitive sequence clustering step  
463 [17]. Thereby, potential length restrictions during the clustering step will not carry over to  
464 computational steps benefitting from longer sequences, such as taxonomic assignments or  
465 phylogeny reconstructions.  
466 In conclusion, LotuS2 is a major improvement over LotuS1, representing pipeline updates that  
467 accumulated over the past eight years. It offers superior computational performance, accuracy  
468 and reproducibility of results, compared to the other tested pipelines. Importantly, it is  
469 straightforward to install, and programmed to reduce required user time and knowledge,  
470 following the idea that less is more with LotuS2.

471

## 472 **Availability and Requirements:**

473 **Availability of LotuS2: Documentation, tutorials:** [lotus2.earlham.ac.uk](https://lotus2.earlham.ac.uk), [Installation via](#)

474 [bioconda: https://anaconda.org/bioconda/lotus2](https://anaconda.org/bioconda/lotus2)

475 Galaxy wrapper (MIT licensed): [https://github.com/TGAC/earlham-](https://github.com/TGAC/earlham-galaxytools/tree/master/tools/lotus2)  
476 [galaxytools/tree/master/tools/lotus2](https://github.com/TGAC/earlham-galaxytools/tree/master/tools/lotus2) and <https://toolshed.g2.bx.psu.edu/view/earlhaminst/lotus2/>  
477 [Galaxy server: https://usegalaxy.eu/](https://usegalaxy.eu/)  
478 Programs (GPLv3 licensed): <https://github.com/hildebra/lotus2>, <https://github.com/hildebra/sdm>,  
479 <https://github.com/hildebra/LCA>

480 All the commands used for the benchmarking are available in

481 [https://github.com/okurt/lotus2\\_benchmarking](https://github.com/okurt/lotus2_benchmarking)

#### 482 **Availability of the data:**

483 Accession numbers for the datasets used for benchmarking in this study are: PRJEB49356

484 Mock-16 community is downloaded from the *mockrobiota* repository [52]:

485 <https://s3-us-west-2.amazonaws.com/mockrobiota/latest/mock-16/mock-forward-read.fastq.gz>

486 <https://s3-us-west-2.amazonaws.com/mockrobiota/latest/mock-16/mock-reverse-read.fastq.gz>

487

#### 488 **List of abbreviations:**

489 **OTU:** Operational taxonomic unit; **ASV:** Amplicon sequence variant; **ITS:** Internal transcribed

490 spacer; **TP:** True positive; **FN:** False negative; **FP:** False positive; **LotuS:** Less OTU Scripts;

491 **sdm:** simple demultiplexer; **LCA:** least common ancestor; **DADA:** The **Divisive** Amplicon

492 Denoising Algorithm; **QIIME:** Quantitative Insights Into Microbial Ecology

493

494

#### 495 **Author contributions**

496 FH programmed LotuS2, sdm and LCA with contributions from JF, EO, MB and NS. EO

497 benchmarked pipelines with help from FH and DN. Websites, Galaxy interface, conda support

498 and installation scripts for LotuS2 were implemented by FH, JF, NS and EO. EO and FH wrote

499 the manuscript with contributions from all authors.

500

## 501 **Funding**

502 EO, FH were supported by European Research Council H2020 StG (erc-stg-948219,  
503 EPYC). EO, JF, DN, FH were supported by the Biotechnology and Biological Sciences  
504 Research Council (BBSRC) Institute Strategic Program Gut Microbes and Health BB/r012490/1  
505 and its constituent project BBS/e/F/000Pr10355. NS and RPD are supported by the  
506 Biotechnology and Biological Sciences Research Council (BBSRC), part of UK Research and  
507 Innovation, Core Capability Grant BB/CCG1720/1 and the National Capability  
508 BBS/E/T/000PR9814. MB was supported by the Swedish Research Councils Vetenskapsrådet  
509 (grants 2017–05019 and 2021-03724) and Formas (grant 2020-00807).

510

## 511 **Acknowledgements:**

512 The authors gratefully thank numerous LotuS1 users for consistent feedback and suggestions  
513 over the years, Sarah Worsley for her valuable comments on the manuscript and Stefano  
514 Romano and Rebecca Ansorge for their user-comments on LotuS2. We also would like to  
515 acknowledge CyVerse UK for the hosting of the LotuS2 website.

516

517

## 518 *Bibliography*

519

- 520 1. Bahram M, Hildebrand F, Forslund SK, Anderson JL, Soudzilovskaia NA, Bodegom PM, et al.  
521 Structure and function of the global topsoil microbiome. *Nature* [Internet]. 2018;560:233–7.  
522 Available from: <http://www.nature.com/articles/s41586-018-0386-6>
- 523 2. Özkurt E, Hassani MA, Sesiz U, Künzel S, Dagan T, Özkan H, et al. Seed-derived microbial  
524 colonization of wild emmer and domesticated bread wheat (*Triticum dicoccoides* and *t.*  
525 *aestivum*) seedlings shows pronounced differences in overall diversity and composition. *MBio*.  
526 2020;11.

- 527 3. Bedarf JR, Beraza N, Khazneh H, Özkurt E, Baker D, Borger V, et al. Much ado about  
528 nothing? Off-target amplification can lead to false-positive bacterial brain microbiome detection  
529 in healthy and Parkinson's disease individuals. *Microbiome* [Internet]. *Microbiome*; 2021;9:75.  
530 Available from: [https://microbiomejournal.biomedcentral.com/articles/10.1186/s40168-021-](https://microbiomejournal.biomedcentral.com/articles/10.1186/s40168-021-01012-1)  
531 [01012-1](https://microbiomejournal.biomedcentral.com/articles/10.1186/s40168-021-01012-1)
- 532 4. Tedersoo L, Anslan S, Bahram M, Põlme S, Riit T, Liiv I, et al. Shotgun metagenomes and  
533 multiple primer pair-barcode combinations of amplicons reveal biases in metabarcoding  
534 analyses of fungi. *MycKeys* [Internet]. Pensoft Publishers; 2015 [cited 2015 May 14];10:1–43.  
535 Available from: <http://mycokeys.pensoft.net/articles.php?id=4852>
- 536 5. Haas BJ, Gevers D, Earl AM, Feldgarden M, Ward D V, Giannoukos G, et al. Chimeric 16S  
537 rRNA sequence formation and detection in Sanger and 454-pyrosequenced PCR amplicons.  
538 *Genome Res* [Internet]. 2011 [cited 2014 Jul 9];21:494–504. Available from:  
539 <http://www.pubmedcentral.nih.gov/articlerender.fcgi?artid=3044863&tool=pmcentrez&rendertype>  
540 [e=abstract](http://www.pubmedcentral.nih.gov/articlerender.fcgi?artid=3044863&tool=pmcentrez&rendertype)
- 541 6. Lee ZM-P, Bussema C, Schmidt TM. rrnDB: documenting the number of rRNA and tRNA  
542 genes in bacteria and archaea. *Nucleic Acids Res* [Internet]. 2009 [cited 2013 Mar 6];37:D489-  
543 93. Available from:  
544 <http://www.pubmedcentral.nih.gov/articlerender.fcgi?artid=2686494&tool=pmcentrez&rendertype>  
545 [e=abstract](http://www.pubmedcentral.nih.gov/articlerender.fcgi?artid=2686494&tool=pmcentrez&rendertype)
- 546 7. Quince C, Lanzen A, Davenport RJ, Turnbaugh PJ. Removing noise from pyrosequenced  
547 amplicons. *BMC Bioinformatics* [Internet]. 2011 [cited 2013 May 23];12:38. Available from:  
548 <http://www.pubmedcentral.nih.gov/articlerender.fcgi?artid=3045300&tool=pmcentrez&rendertype>  
549 [e=abstract](http://www.pubmedcentral.nih.gov/articlerender.fcgi?artid=3045300&tool=pmcentrez&rendertype)
- 550 8. Callahan BJ, McMurdie PJ, Rosen MJ, Han AW, Johnson AJA, Holmes SP. DADA2: High-  
551 resolution sample inference from Illumina amplicon data. *Nat Methods* [Internet]. Nature  
552 Publishing Group; 2016;13:581–3. Available from: <http://dx.doi.org/10.1038/nmeth.3869>

- 553 9. Hildebrand F. Ultra-resolution Metagenomics: When Enough Is Not Enough. *mSystems*  
554 [Internet]. 2021;e0088121. Available from: <http://www.ncbi.nlm.nih.gov/pubmed/34463579>
- 555 10. de Oliveira Martins L, Page AJ, Mather AE, Charles IG. Taxonomic resolution of the  
556 ribosomal RNA operon in bacteria: implications for its use with long-read sequencing. *NAR*  
557 *Genomics Bioinforma* [Internet]. Oxford University Press; 2020;2:1–7. Available from:  
558 <https://academic.oup.com/nargab/article/doi/10.1093/nargab/lqz016/5625502>
- 559 11. Schloss PD, Westcott SL, Ryabin T, Hall JR, Hartmann M, Hollister EB, et al. Introducing  
560 mothur: open-source, platform-independent, community-supported software for describing and  
561 comparing microbial communities. *Appl Environ Microbiol* [Internet]. 2009 [cited 2013 Mar  
562 1];75:7537–41. Available from: <http://aem.asm.org/cgi/content/abstract/75/23/7537>
- 563 12. Bolyen E, Rideout JR, Dillon MR, Bokulich NA, Abnet CC, Al-Ghalith GA, et al.  
564 Reproducible, interactive, scalable and extensible microbiome data science using QIIME 2. *Nat*  
565 *Biotechnol* [Internet]. 2019;37:852–7. Available from: [http://www.nature.com/articles/s41587-](http://www.nature.com/articles/s41587-019-0209-9)  
566 [019-0209-9](http://www.nature.com/articles/s41587-019-0209-9)
- 567 13. Hildebrand F, Tadeo R, Voigt A, Bork P, Raes J. LotuS: an efficient and user-friendly OTU  
568 processing pipeline. *Microbiome* [Internet]. BioMed Central Ltd; 2014 [cited 2014 Sep 30];2:30.  
569 Available from: <http://www.microbiomejournal.com/content/2/1/30>
- 570 14. Prodan A, Tremaroli V, Brolin H, Zwinderman AH, Nieuwdorp M, Levin E. Comparing  
571 bioinformatic pipelines for microbial 16S rRNA amplicon sequencing. *PLoS One*. 2020;15.
- 572 15. Hupfauf S, Etemadi M, Juárez MFD, Gómez-Brandón M, Insam H, Podmirseg SM. CoMA –  
573 an intuitive and user-friendly pipeline for amplicon-sequencing data analysis. *PLoS One*.  
574 2020;15.
- 575 16. Reeder J, Knight R. The “rare biosphere”: a reality check. *Nat Methods* [Internet].  
576 2009;6:636–7. Available from: <http://www.ncbi.nlm.nih.gov/pubmed/19718016>
- 577 17. Edgar RC. UPARSE: highly accurate OTU sequences from microbial amplicon reads. *Nat*  
578 *Methods* [Internet]. 2013 [cited 2014 May 23];10:996–8. Available from:

- 579 <http://www.ncbi.nlm.nih.gov/pubmed/23955772>
- 580 18. Jeon Y-S, Park S-C, Lim J, Chun J, Kim B-S. Improved pipeline for reducing erroneous  
581 identification by 16S rRNA sequences using the Illumina MiSeq platform. *J Microbiol* [Internet].  
582 2015;53:60–9. Available from: <http://link.springer.com/article/10.1007/s12275-015-4601-y#page->  
583 1
- 584 19. Kozich JJ, Westcott SL, Baxter NT, Highlander SK, Schloss PD. Development of a dual-  
585 index sequencing strategy and curation pipeline for analyzing amplicon sequence data on the  
586 miseq illumina sequencing platform. *Appl Environ Microbiol*. 2013;79:5112–20.
- 587 20. Sinclair L, Osman OA, Bertilsson S, Eiler A. Microbial community composition and diversity  
588 via 16S rRNA gene amplicons: Evaluating the illumina platform. *PLoS One*. 2015;10.
- 589 21. Puente-Sanchez F, Aguirre J, Parro V, Puente-s F, Aguirre J. A novel conceptual approach  
590 to read-filtering in high-throughput amplicon sequencing studies. *Nucleic Acids Res* [Internet].  
591 2015 [cited 2015 Nov 9];gkv1113-. Available from:  
592 <http://nar.oxfordjournals.org/content/early/2015/11/06/nar.gkv1113.abstract>
- 593 22. Afgan E, Baker D, Batut B, Van Den Beek M, Bouvier D, Ech M, et al. The Galaxy platform  
594 for accessible, reproducible and collaborative biomedical analyses: 2018 update. *Nucleic Acids*  
595 *Res*. 2018;46.
- 596 23. Frøslev TG, Kjøller R, Bruun HH, Ejrnæs R, Brunbjerg AK, Pietroni C, et al. Algorithm for  
597 post-clustering curation of DNA amplicon data yields reliable biodiversity estimates. *Nat*  
598 *Commun* [Internet]. Springer US; 2017;8. Available from: <http://dx.doi.org/10.1038/s41467-017->  
599 01312-x
- 600 24. McDonald D, Clemente JC, Kuczynski J, Rideout JR, Stombaugh J, Wendel D, et al. The  
601 Biological Observation Matrix (BIOM) format or: how I learned to stop worrying and love the  
602 ome-ome. *Gigascience* [Internet]. 2012;1:7. Available from:  
603 <http://www.pubmedcentral.nih.gov/articlerender.fcgi?artid=3626512&tool=pmcentrez&rendertype>  
604 e=abstract

- 605 25. McMurdie PJ, Holmes S. phyloseq: an R package for reproducible interactive analysis and  
606 graphics of microbiome census data. Watson M, editor. PLoS One. Public Library of Science;  
607 2013;8:e61217.
- 608 26. Edgar RC. UNOISE2: improved error-correction for Illumina 16S and ITS amplicon  
609 sequencing. bioRxiv.
- 610 27. Fu L, Niu B, Zhu Z, Wu S, Li W. CD-HIT: Accelerated for clustering the next-generation  
611 sequencing data. Bioinformatics. 2012;28:3150–2.
- 612 28. Mahé F, Rognes T, Quince C, de Vargas C, Dunthorn M. Swarm: robust and fast clustering  
613 method for amplicon-based studies. PeerJ [Internet]. 2014 [cited 2014 Dec 9];2:e593. Available  
614 from: <https://peerj.com/articles/593>
- 615 29. Rognes T, Flouri T, Nichols B, Quince C, Mahé F. VSEARCH: A versatile open source tool  
616 for metagenomics. PeerJ. 2016;2016:1–22.
- 617 30. Edgar R. UCHIME2: improved chimera prediction for amplicon sequencing. bioRxiv  
618 [Internet]. 2016;074252. Available from: <http://biorxiv.org/lookup/doi/10.1101/074252>
- 619 31. Bengtsson-Palme J, Ryberg M, Hartmann M, Branco S, Wang Z, Godhe A, et al. ITSx:  
620 Improved software detection and extraction of ITS1 and ITS2 from ribosomal ITS sequences of  
621 fungi and other eukaryotes for analysis of environmental sequencing data. Bunce M, editor.  
622 Methods Ecol Evol [Internet]. 2013;n/a-n/a. Available from:  
623 <https://onlinelibrary.wiley.com/doi/10.1111/2041-210X.12073>
- 624 32. Edgar R. UNCROSS2: identification of cross-talk in 16S rRNA OTU tables. 2018;
- 625 33. Li H. Minimap2: pairwise alignment for nucleotide sequences. Birol I, editor. Bioinformatics  
626 [Internet]. 2018;34:3094–100. Available from:  
627 <https://academic.oup.com/bioinformatics/article/34/18/3094/4994778>
- 628 34. Liu Z, DeSantis TZ, Andersen GL, Knight R. Accurate taxonomy assignments from 16S  
629 rRNA sequences produced by highly parallel pyrosequencers. Nucleic Acids Res.  
630 2008;36:e120.



- 631 35. Edgar R. SINTAX: a simple non-Bayesian taxonomy classifier for 16S and ITS sequences.  
632 bioRxiv. 2016;
- 633 36. Hauswedell H, Singer J, Reinert K. Lambda: the local aligner for massive biological data.  
634 Bioinformatics [Internet]. 2014 [cited 2014 Aug 26];30:i349–55. Available from:  
635 <http://bioinformatics.oxfordjournals.org/cgi/doi/10.1093/bioinformatics/btu439>
- 636 37. Altschul SF, Gish W, Miller W, Myers EW, Lipman DJ. Basic local alignment search tool. J  
637 Mol Biol [Internet]. 1990 [cited 2013 Feb 28];215:403–10. Available from:  
638 [http://dx.doi.org/10.1016/S0022-2836\(05\)80360-2](http://dx.doi.org/10.1016/S0022-2836(05)80360-2)
- 639 38. Edgar RC. Search and clustering orders of magnitude faster than BLAST. Bioinforma  
640 [Internet]. 2010;26:2460–1. Available from:  
641 [http://www.ncbi.nlm.nih.gov/entrez/query.fcgi?cmd=Retrieve&db=PubMed&dopt=Citation&list\\_uids=20709691](http://www.ncbi.nlm.nih.gov/entrez/query.fcgi?cmd=Retrieve&db=PubMed&dopt=Citation&list_uids=20709691)  
642 ds=20709691
- 643 39. Yilmaz P, Parfrey LW, Yarza P, Gerken J, Pruesse E, Quast C, et al. The SILVA and “All-  
644 species Living Tree Project (LTP)” taxonomic frameworks. Nucleic Acids Res. 2014;42:D643-8.
- 645 40. McDonald D, Price MN, Goodrich J, Nawrocki EP, DeSantis TZ, Probst A, et al. An  
646 improved Greengenes taxonomy with explicit ranks for ecological and evolutionary analyses of  
647 bacteria and archaea. ISME J [Internet]. Nature Publishing Group; 2012 [cited 2013 Sep  
648 19];6:610–8. Available from: <http://www.nature.com/doi/10.1038/ismej.2011.139>
- 649 41. Ritari J, Salojärvi J, Lahti L, de Vos WM. Improved taxonomic assignment of human  
650 intestinal 16S rRNA sequences by a dedicated reference database. BMC Genomics [Internet].  
651 BMC Genomics; 2015;16:1056. Available from: [http://www.biomedcentral.com/1471-  
652 2164/16/1056](http://www.biomedcentral.com/1471-2164/16/1056)
- 653 42. Guillou L, Bachar D, Audic S, Bass D, Berney C, Bittner L, et al. The Protist Ribosomal  
654 Reference database (PR2): A catalog of unicellular eukaryote Small Sub-Unit rRNA sequences  
655 with curated taxonomy. Nucleic Acids Res. 2013;41.
- 656 43. Jones JC, Fruciano C, Hildebrand F, Al Toufalilia H, J Balfour N, Bork P, et al. Gut

- 657 microbiota composition is associated with environmental landscape in honey bees. *Ecol Evol*  
658 [Internet]. 2017;1–11. Available from: <http://doi.wiley.com/10.1002/ece3.3597>
- 659 44. Kõljalg U, Nilsson RH, Abarenkov K, Tedersoo L, Taylor AFS, Bahram M, et al. Towards a  
660 unified paradigm for sequence-based identification of fungi. *Mol Ecol* [Internet]. 2013;22:5271–  
661 7. Available from: <http://doi.wiley.com/10.1111/mec.12481>
- 662 45. Katoh K, Standley DM. MAFFT Multiple Sequence Alignment Software Version 7:  
663 Improvements in Performance and Usability. *Mol Biol Evol* [Internet]. 2013;30:772–80. Available  
664 from: <http://www.ncbi.nlm.nih.gov/pubmed/23329690>
- 665 46. Sievers F, Wilm A, Dineen D, Gibson TJ, Karplus K, Li W, et al. Fast, scalable generation of  
666 high-quality protein multiple sequence alignments using Clustal Omega. *Mol Syst Biol* [Internet].  
667 2011 [cited 2013 Sep 19];7:539. Available from: <http://www.ncbi.nlm.nih.gov/pubmed/21988835>
- 668 47. Price MN, Dehal PS, Arkin AP. FastTree 2--approximately maximum-likelihood trees for  
669 large alignments. Poon AFY, editor. *PLoS One* [Internet]. Public Library of Science; 2010 [cited  
670 2013 Oct 30];5:e9490. Available from: <http://dx.plos.org/10.1371/journal.pone.0009490>
- 671 48. Nguyen L-T, Schmidt HA, von Haeseler A, Minh BQ. IQ-TREE: A Fast and Effective  
672 Stochastic Algorithm for Estimating Maximum-Likelihood Phylogenies. *Mol Biol Evol* [Internet].  
673 2015;32:268–74. Available from: [https://academic.oup.com/mbe/article-](https://academic.oup.com/mbe/article-lookup/doi/10.1093/molbev/msu300)  
674 [lookup/doi/10.1093/molbev/msu300](https://academic.oup.com/mbe/article-lookup/doi/10.1093/molbev/msu300)
- 675 49. Amir A, McDonald D, Navas-Molina JA, Kopylova E, Morton JT, Zech Xu Z, et al. Deblur  
676 Rapidly Resolves Single-Nucleotide Community Sequence Patterns. Gilbert JA, editor.  
677 *mSystems* [Internet]. 2017;2:1–7. Available from:  
678 <https://journals.asm.org/doi/10.1128/mSystems.00191-16>
- 679 50. Rivers AR, Weber KC, Gardner TG, Liu S, Armstrong SD. ITSxpress: Software to rapidly  
680 trim internally transcribed spacer sequences with quality scores for marker gene analysis  
681 [version 1; peer review: 2 approved]. *F1000Research*. 2018;7.
- 682 51. Nilsson RH, Anslan S, Bahram M, Wurzbacher C, Baldrian P, Tedersoo L. Mycobiome

- 683 diversity: high-throughput sequencing and identification of fungi. *Nat. Rev. Microbiol.* 2019.
- 684 52. Bokulich NA, Rideout JR, Mercurio WG, Shiffer A, Wolfe B, Maurice CF, et al. mockrobiota:  
685 a Public Resource for Microbiome Bioinformatics Benchmarking. *mSystems.* 2016;1.
- 686 53. Saary P, Forslund K, Bork P, Hildebrand F. RTK: efficient rarefaction analysis of large  
687 datasets. Birol I, editor. *Bioinformatics [Internet].* 2017;33:2594–5. Available from:  
688 <https://academic.oup.com/bioinformatics/article/33/16/2594/3111845>
- 689 54. Bokulich NA, Kaehler BD, Rideout JR, Dillon M, Bolyen E, Knight R, et al. Optimizing  
690 taxonomic classification of marker-gene amplicon sequences with QIIME 2's q2-feature-  
691 classifier plugin. *Microbiome.* 2018;6.
- 692 55. Větrovský T, Baldrian P. The Variability of the 16S rRNA Gene in Bacterial Genomes and Its  
693 Consequences for Bacterial Community Analyses. Neufeld J, editor. *PLoS One [Internet]. Public*  
694 *Library of Science;* 2013 [cited 2013 Mar 2];8:e57923. Available from:  
695 <http://dx.plos.org/10.1371/journal.pone.0057923>
- 696 56. Kunin V, Engelbrektsen A, Ochman H, Hugenholtz P. Wrinkles in the rare biosphere:  
697 pyrosequencing errors can lead to artificial inflation of diversity estimates. *Environ Microbiol*  
698 *[Internet].* 2010 [cited 2013 May 21];12:118–23. Available from:  
699 <http://www.ncbi.nlm.nih.gov/pubmed/19725865>

700

701

702

703

704

705

706

707

708

709

710

711

712

713 **Figures:**  
714

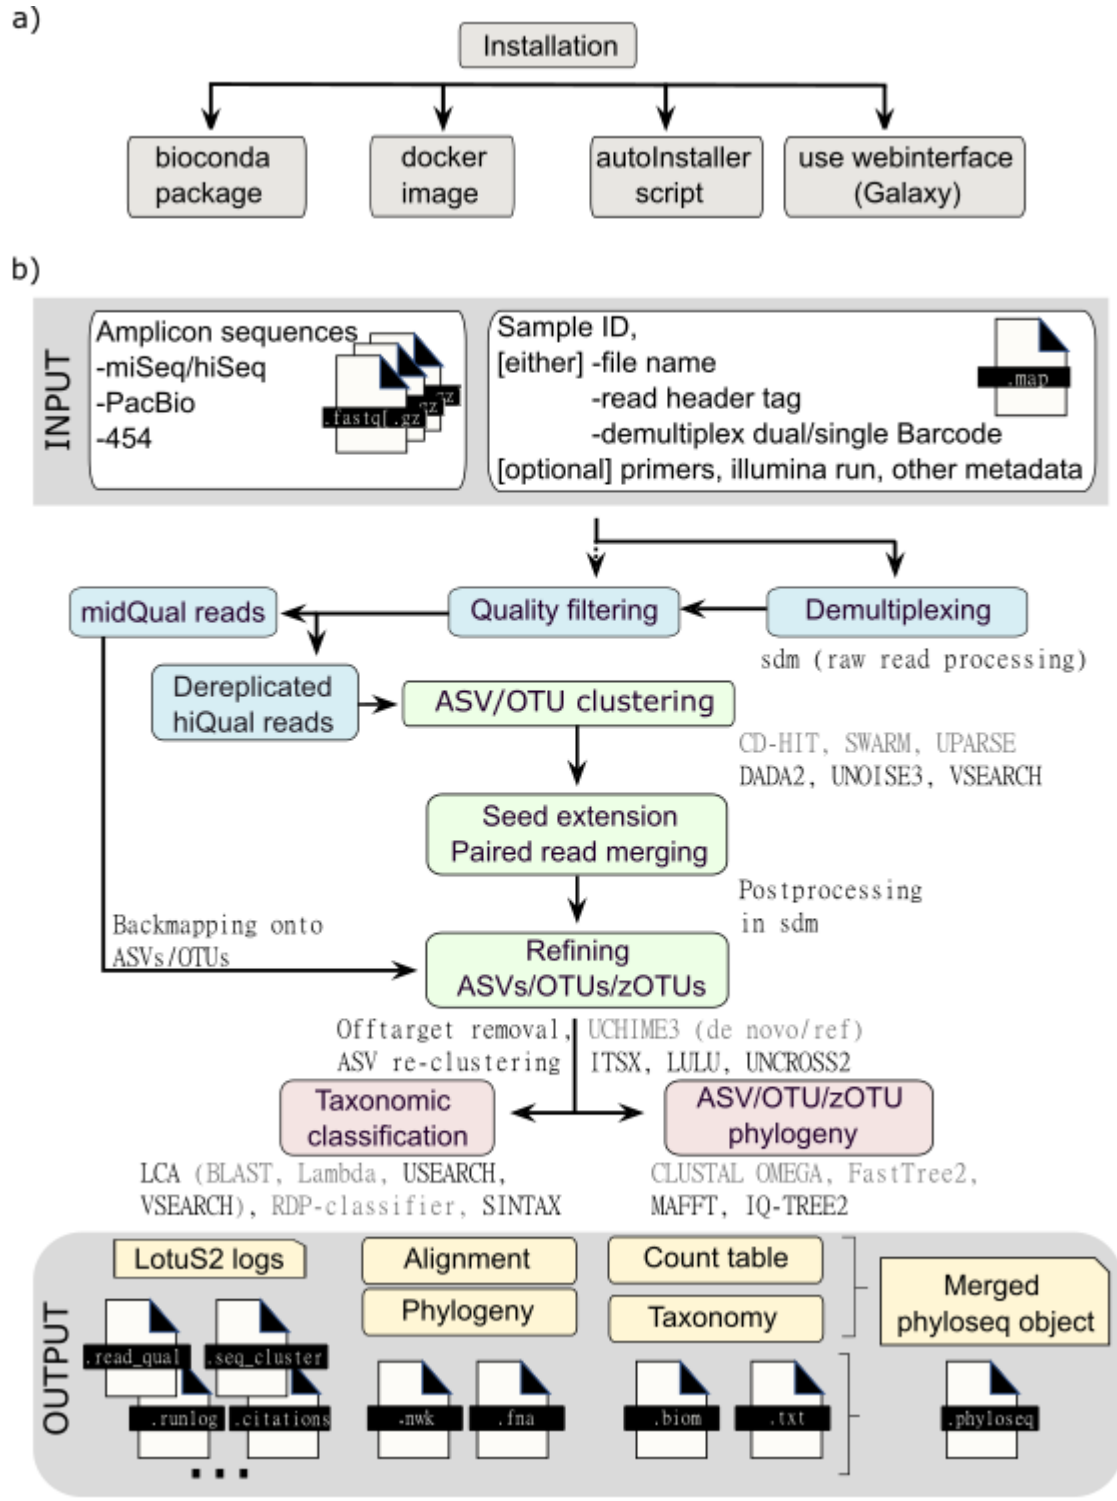

715  
716  
717

**Figure 1- Workflow of the LotuS2 Pipeline**

718 **a)** LotuS2 can be installed either through i) Bioconda, ii) GitHub with the provided autoInstaller  
719 script or iii) using a Docker image. Alternatively, iv) Galaxy web servers can also run LotuS2  
720 (e.g. <https://usegalaxy.eu/>) **b)** LotuS2 accepts amplicon reads from different sequencing  
721 platforms, along with a map file that describes barcodes, file locations, sample IDs and other  
722 information. After demultiplexing and quality filtering, high-quality reads are clustered into either  
723 ASVs or OTUs. The optimal sequence representing each OTU/ASV is calculated in the seed  
724 extension step, where read pairs are also merged. Mid-quality reads are subsequently mapped  
725 onto these sequence clusters, to increase cluster representation in abundance matrices. From  
726 OTU/ASV sequences, a phylogenetic tree is constructed, and each cluster is taxonomically  
727 assigned. These results are made available in multiple standard formats, such as tab-delimited  
728 files, .biom or phyloseq objects, to enable downstream analysis. New options in LotuS2 for each  
729 step are denoted with black colour whereas options in grey font were already available in LotuS.  
730  
731  
732

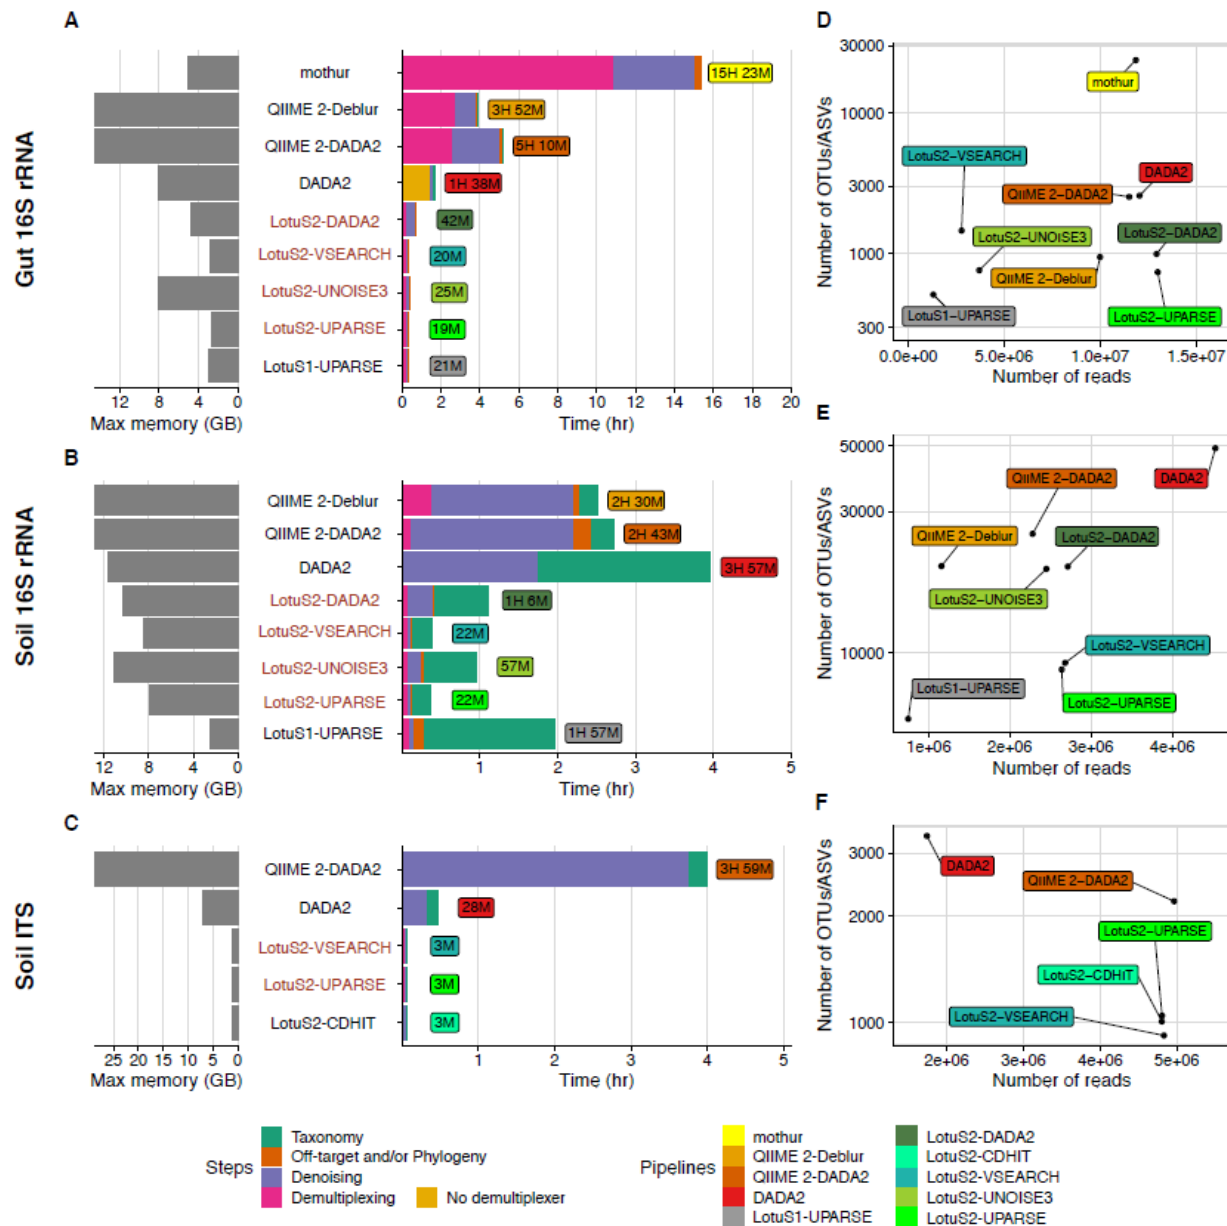

733

734 **Figure 2: Computational performance of amplicon sequencing pipelines**

735 16S rRNA amplicon MiSeq data from A) gut-16S and B) soil-16S and C) soil-ITS samples were  
 736 processed to benchmark resource usage of each pipeline, run on the same system under equal  
 737 conditions (12 cores, max 150Gb memory). In all pipelines, OTUs/ASVs were classified by  
 738 similarity comparisons to SILVA 138.1. In LotuS2, LAMBDA was used to align sequences for all  
 739 clustering algorithms.

740 Pipeline runs were separated by common steps (pre-processing, sequence clustering,  
 741 taxonomic classification and phylogenetic tree construction and/or off-target removal). Because  
 742 native DADA2 cannot demultiplex reads, we used the average demultiplexing time of QIIME 2  
 743 and LotuS2 (LotuS2 demultiplexed, unfiltered reads were provided to DADA2). LotuS2 pipelines  
 744 are labelled with red colour.

745 D, E, F) Data usage efficiency of each tested pipeline, by comparing the number of sequence  
 746 clusters (OTUs or ASVs) to retrieved read counts in the final output matrix of each pipeline.  
 747 Note that mothur results on soil-16S are not shown, because the pipeline rejected with default  
 748 parameters all sequences.

749

750

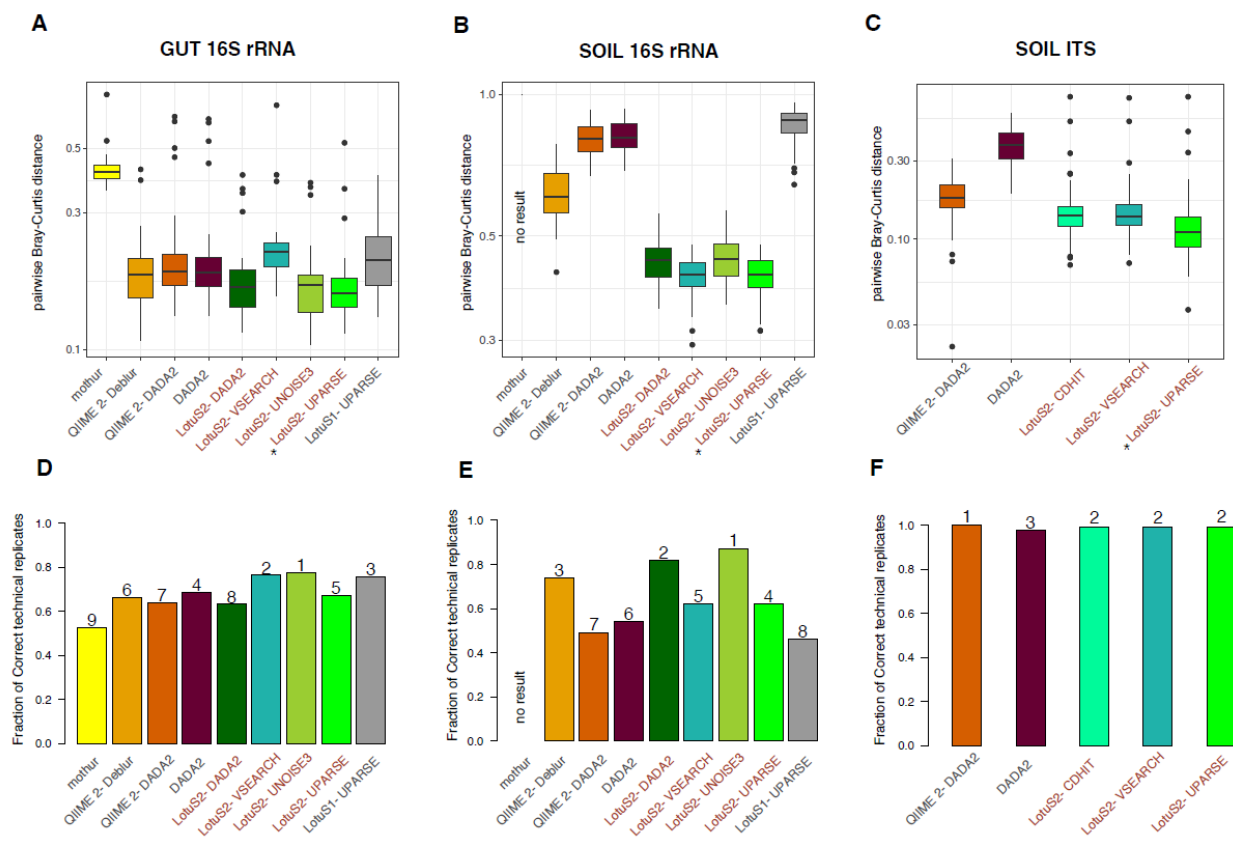

751

752 **Figure 3- Reproducibility from different amplicon sequence data analysis pipelines.**

753 Three independent datasets were used to represent different biomes and amplicon  
 754 technologies, using A, D) human faecal samples (16S rRNA gene, N=40 replicates). B, E) soil  
 755 samples (16S rRNA gene, N=50 replicates) and C, F) soil samples (ITS 2, N=50 replicates).  
 756 A-C) Bray-Curtis distances among technical replicate samples are used to assess the  
 757 reproducibility of community compositions by different pipelines. The pipeline with the lowest  
 758 BCd in each subfigure is denoted with a star (\*). The significance of pairwise comparisons of  
 759 each pipeline is calculated using the Tukey's HSD test (**Supp. Table 2**).  
 760 D-F) Further, the fraction of technical replicates being closest to each other (BCd) was  
 761 calculated to simulate identifying technical replicates without additional knowledge. Numbers  
 762 above bars are the ordered pipelines performing best.  
 763 Lower Bray-Curtis distances between technical replicates and a higher fraction of correct  
 764 technical replicates indicate better reproducibility. LotuS2 pipelines are labelled with red colour.

765  
766

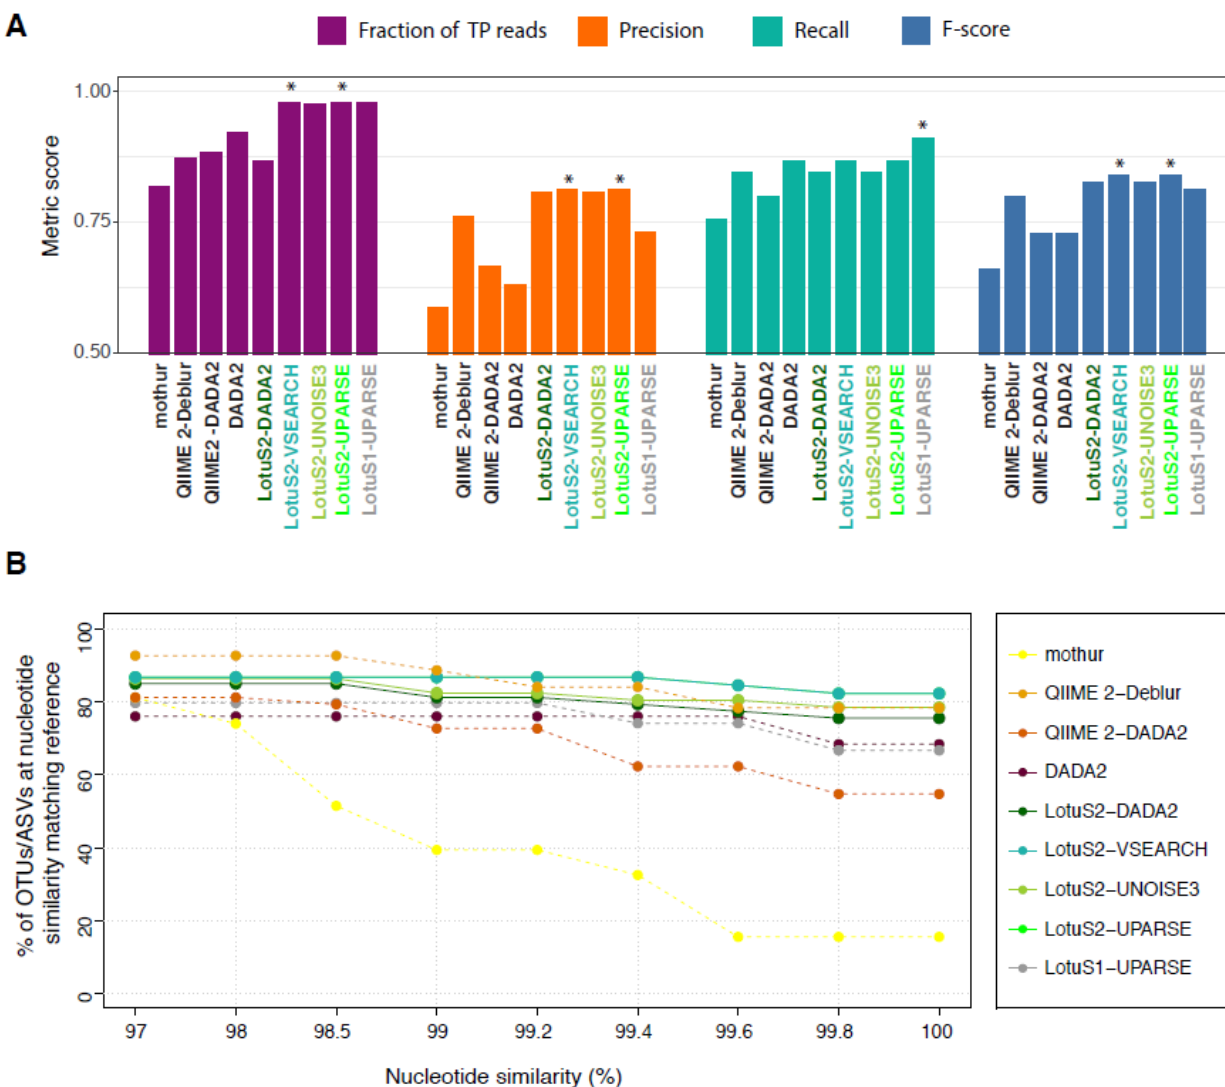

767  
768  
769

**Figure 4- Benchmarking of amplicon sequence data analysis pipeline's performance using a mock community with known species composition**

770 A) Accuracy of each pipeline in predicting the mock community composition at genus level. For  
771 benchmarking we compared the fraction of reads assigned to true genera and both correctly  
772 and erroneously recovered genera. Precision, Recall and F-score were calculated based on the  
773 true positive, false positive and false negative taxa identified. At species level, LotuS2 excelled  
774 as well in these statistics (Supp. Figure 9).

775 B) Percentage of true positive ASVs/OTUs having a nucleotide identity  $\geq$  indicated thresholds to  
776 16S rRNA gene sequences of genomes from the mock community.

777 Pipeline(s) showing the highest performance in each comparison is denoted with a star (\*). TP,  
778 true positive; ASV, amplicon sequencing variant; OTU, operational taxonomic unit.

779



780 **Supp. Figures and Tables:**

781

The screenshot displays the Galaxy web interface for the 'LotuS2 fast OTU processing pipeline (Galaxy Version 2.09.2)'. The interface includes a navigation bar at the top with links for 'Workflow', 'Visualize', 'Shared Data', 'Help', 'Login or Register', and a user profile icon. Below the navigation bar, there is a header for the pipeline and a dropdown menu for 'Single- or Paired-end data?' set to 'Single-end'. A message box indicates that no fastqsanger or fastqsanger.gz dataset is available. Below this, there are input fields for 'Mapping file (optional)', 'SDM option file (optional)', and 'Barcode (MID) sequences (optional)', all of which currently show 'No dataset available'. There are also fields for 'Sequencing platform' (set to '(Default)') and 'Remove likely contaminant OTUs/ASVs based on alignment to host genome' (set to 'Disabled'). At the bottom, there are sections for 'Clustering Options' and 'Taxonomy Options', and a blue 'Execute' button.

782

783 **Supp. Figure 1: Galaxy web interface of LotuS2**

784 Raw reads can be uploaded into the LotuS2 via the Galaxy web interface and analysed  
785 (accessible on <https://usegalaxy.eu/>).

786

787

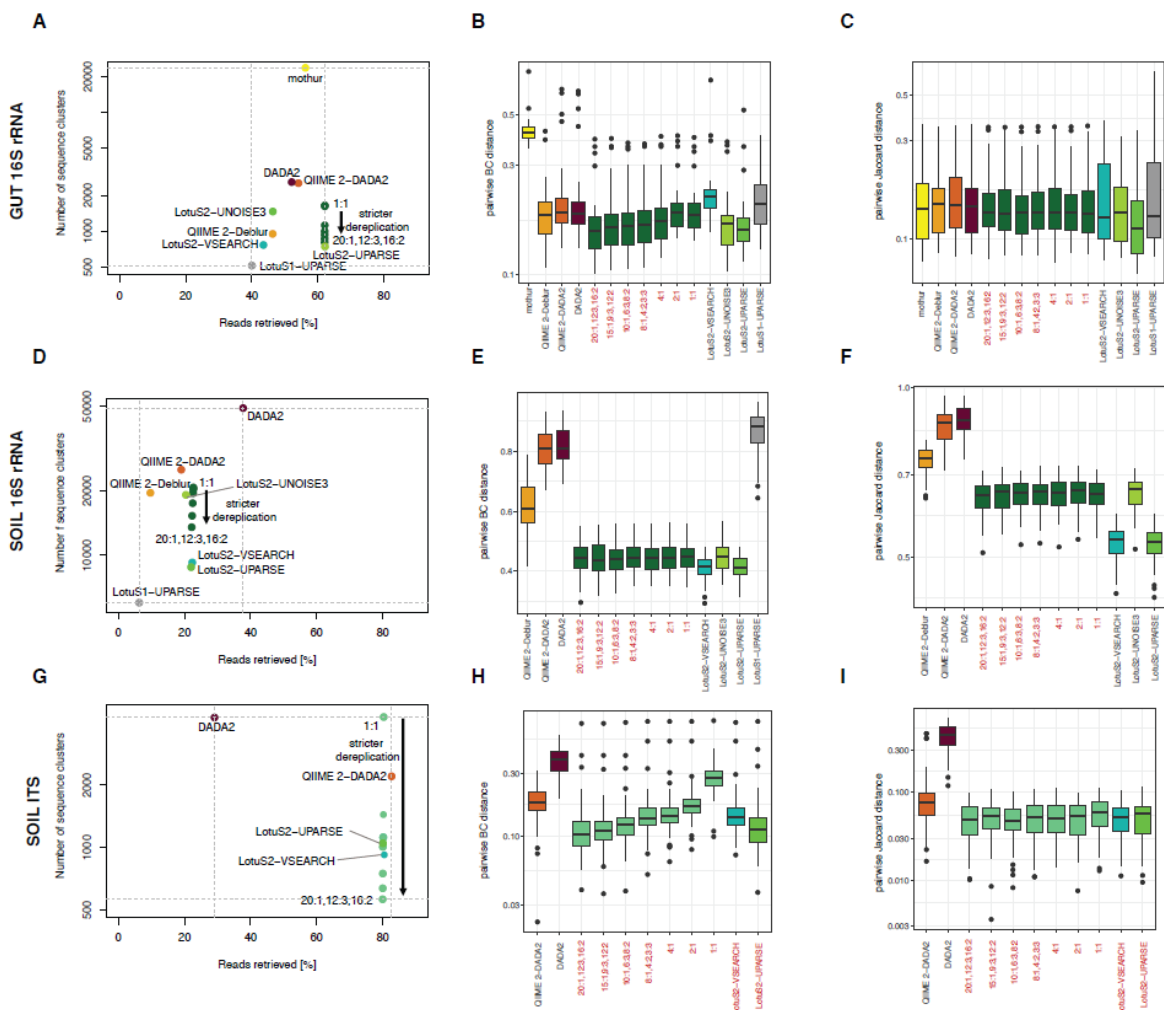

788  
 789 **Supp. Figure 2- Reproducibility and data usage efficiency respective to dereplication**  
 790 **filtering.**  
 791 A, D and G) Data usage efficiency of each tested pipeline at different dereplication parameters  
 792 of LotuS2 (from strictest to least strict dereplication: 20:1,12:3,6:2; 15:1,9:3,12:2; 10:1,6:3,8:2;  
 793 8:1,4:2,3:3 (default); 4:1; 2:1 and 1:1) using DADA2 or CD-HIT clustering for 16S and ITS  
 794 dataset, respectively, by comparing the number of sequence clusters (OTUs/ASVs) to retrieved  
 795 read counts in final output matrix.  
 796 The dereplication can be fine controlled through a syntax. For example, 8:1,4:2,3:3 means that  
 797 a read is accepted, if it occurs  $\geq 8$  times in  $\geq 1$  samples **or**  $>4$  times total in  $\geq 2$  samples **or**  
 798  $\geq 3$  times in  $\geq 3$  samples.  
 799  
 800

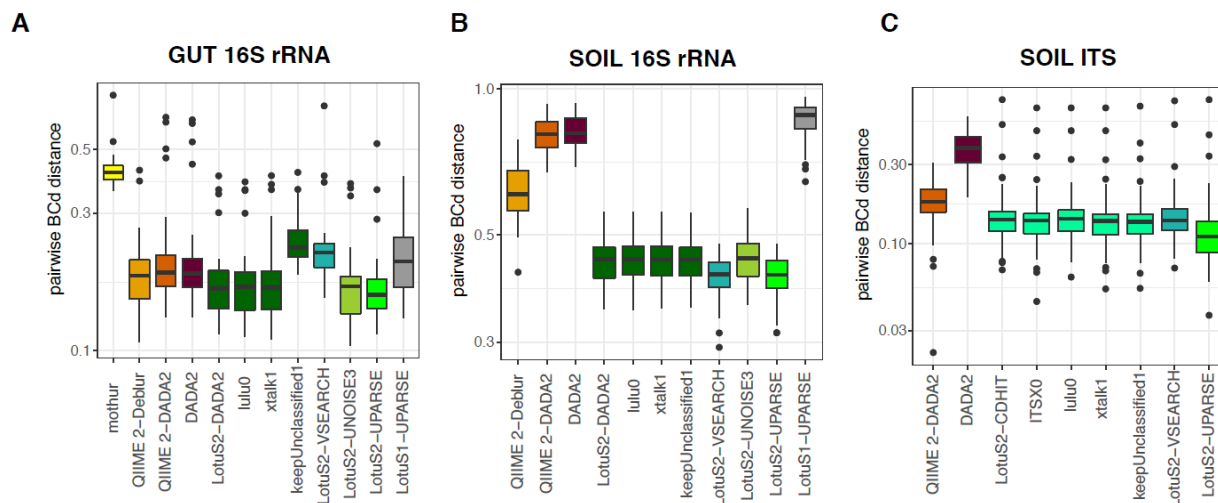

801  
802  
803 **Supp. Figure 3- Reproducibility of the technical replicates respective to different LotuS2**  
804 **non-default parameters**

805 Bray-Curtis distances between technical replicates of A) gut-16S B) soil-16S and C) soil-ITS  
806 datasets using default and non-default parameters (LotuS2 flags: -lulu 0, -xtalk 1, -  
807 keepUnclassified 1, -ITSx 0, where 1 means the option is activated; 0 means deactivated).  
808 When activated, -lulu option uses LULU R package [23] to merge OTUs/ASVs based on their  
809 co-occurrences; -xtalk option checks for cross-talk [32], -keepUnclassified includes unclassified  
810 (i.e. not matching to any taxon in the taxonomy database) OTUs/ASVs in the final matrix and -  
811 ITSx activates the ITSx program [31] to only retain OTUs fitting to ITS1/ITS2 hmm models.

812

813

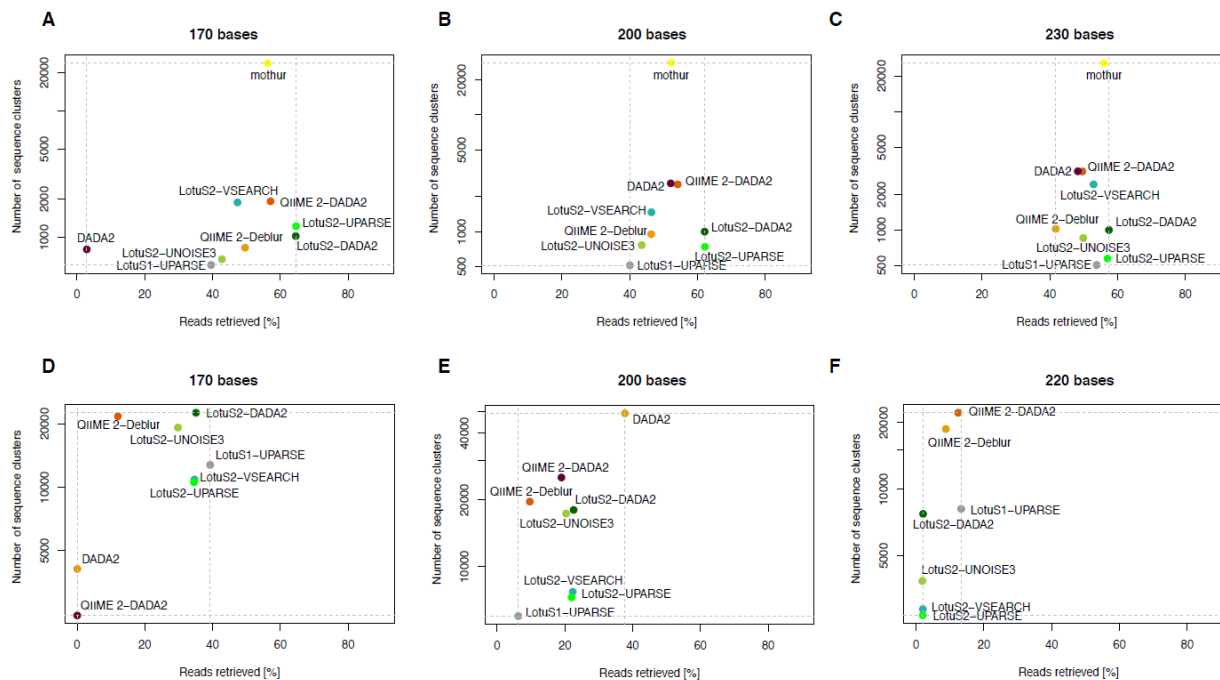

814

815 **Supp. Figure 4- Data usage efficiency of different amplicon sequence data analysis**  
 816 **pipelines.**

817

818 Data usage efficiency on gut 16S rRNA (gut- 16S), soil 16S rRNA (soil-16S) and Soil ITS (soil-  
 819 ITS) amplicons, tested with different pipelines at different read truncation lengths (170, 200, 230  
 820 & 170, 200, 220 bases for the gut and soil datasets, respectively), by comparing the number of  
 821 sequence clusters (ASVs /OTUs) to retrieved read counts in the final output matrix of each  
 822 pipeline. In all other analysis, default values were used for LotuS2 (200 bases).

823

824

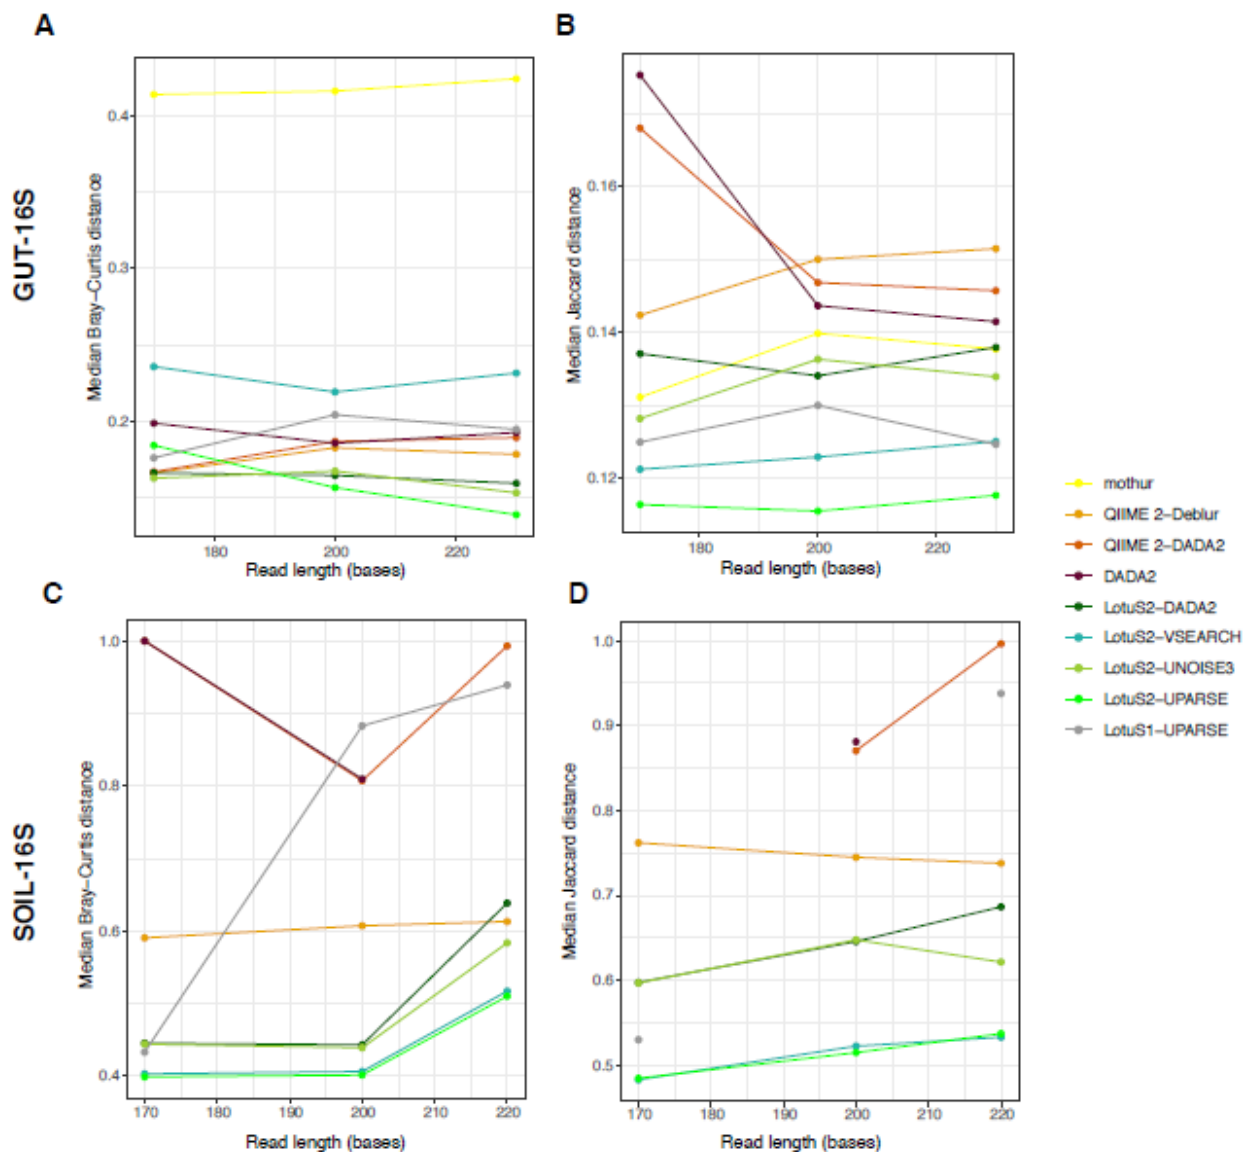

825

826 **Supp. Figure 5- Reproducibility of beta diversity at different read truncation lengths**

827 Reproducibility of sequenced technical replicates, by measuring the Bray-Curtis (A and C) and  
 828 Jaccard distances (B and D) of the microbiome composition among technical replicate samples.  
 829 Two datasets were used to represent different biomes and amplicon technologies, using (A, B)  
 830 and human faecal samples (16S rRNA primer, N=40 replicates) and (C, D) soil samples (16S  
 831 rRNA, V4-V5 region primers, N=50 replicates). Lower Bray-Curtis or Jaccard distances between  
 832 technical replicates indicate better reproducibility of community compositions.  
 833 Default pipeline parameters and recommended settings for each dataset were used (Please see  
 834 the Supp. Text for further information).

835

836

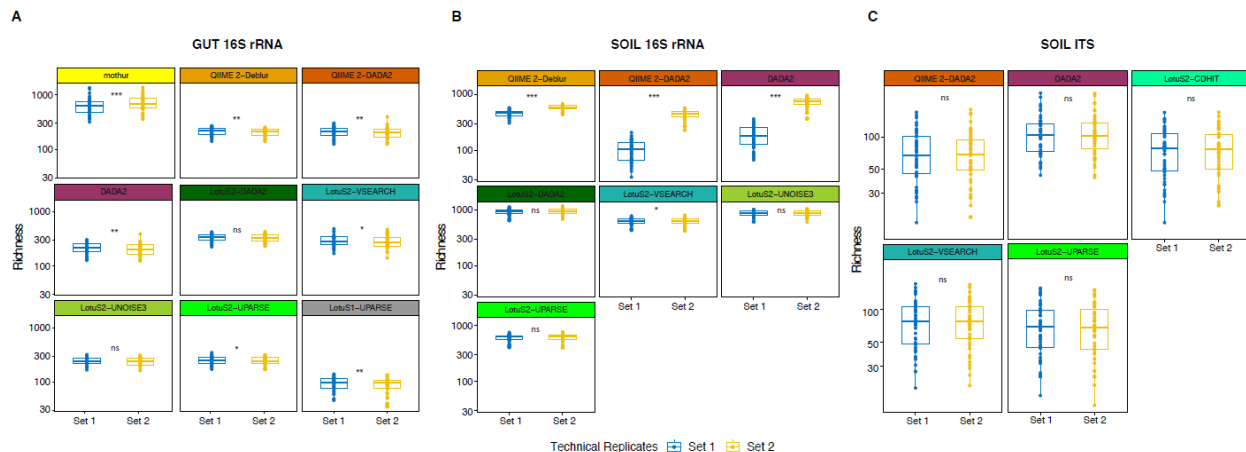

837  
838  
839

**Supp. Figure 6: Reproducibility of alpha diversity between technical replicates.**

840 OTU/ASV Richness was calculated for A) gut-16S B) soil-16S and C) soil-ITS datasets.  
841 Samples were rarefied to an equal number of reads per sample before calculating richness, and  
842 any samples whose replicate pair was removed after rarefaction (because of having lower  
843 number of reads than the rarefaction depth) were excluded from further analysis. LotuS1 results  
844 for soil-16S were removed due to too many samples being removed in rarefactions. Significance  
845 of differences in richness between the sets were calculated based on the paired samples  
846 Wilcoxon test (\*\*\*, \*\*, \* and “ns” denotes  $p < 0.0005$ ,  $p < 0.005$ ,  $p < 0.05$  and  $p > 0.05$  (i.e. not  
847 significant), respectively).  
848

849

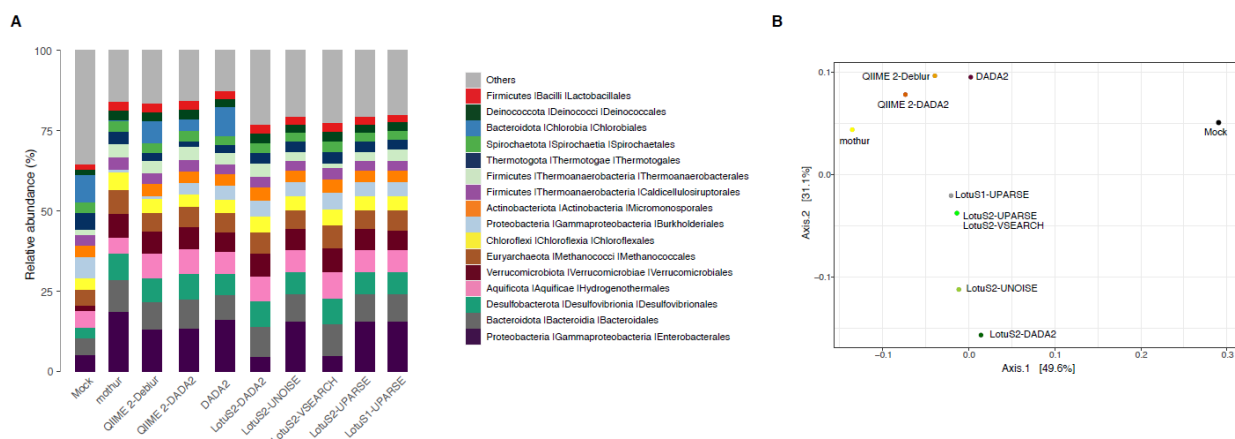

850

**Supp. Figure 7: Observed composition of the mock community compared to the composition predicted by each pipeline**

851 A) Relative abundances of the 16 orders having the highest abundance.  
852 B) Bray-Curtis distance based PCoA of the observed composition of the mock sample and  
853 composition predicted by each pipeline  
854  
855

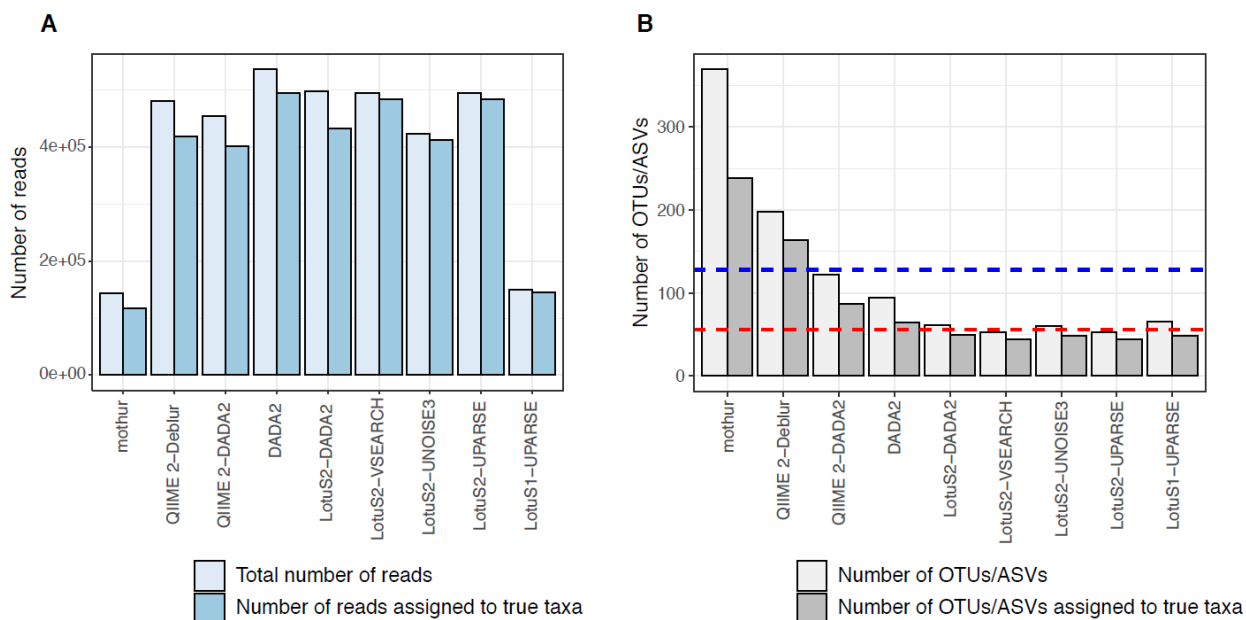

856

857 **Supp. Figure 8: Number of reads and OTUs/ASVs and those assigned true taxa at genus**

858 **level by each pipeline in the analysis of the mock community**

859 Total number of A) reads retrieved by each pipeline and those assigned to true taxa at genus  
 860 level B) OTUs/ASVs generated by each pipeline and those assigned to true taxa at genus level.  
 861 Blue and red line indicates number of 16S gene copies and species, respectively, in the mock  
 862 community.

863

864

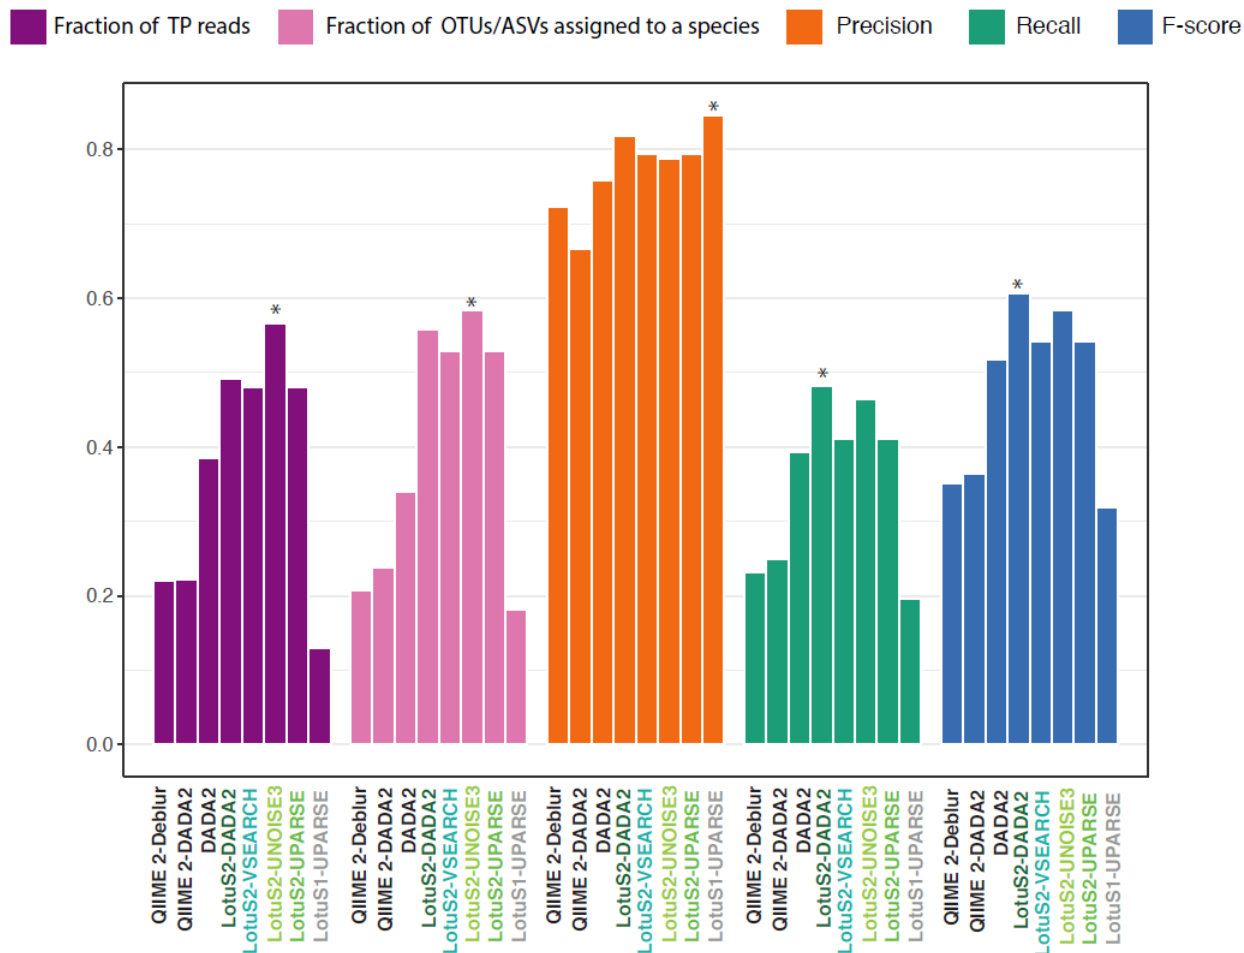

865  
866

867 **Supp. Figure 9: Accuracy of each pipeline in predicting the mock community**  
868 **composition at species level.**

869 For benchmarking we compared the fraction of reads assigned to true taxa and both correctly  
870 and erroneously recovered taxa at the species level from the mock community.

871  
872  
873  
874  
875  
876  
877  
878  
879  
880  
881  
882



| <b>Gut-16S</b> |                        |                            |
|----------------|------------------------|----------------------------|
|                | <b>Number of reads</b> | <b>Number of OTUs/ASVs</b> |
| mothur         | 11855762               | 23736                      |
| QIIME 2-Deblur | 9995254                | 950                        |
| QIIME 2-DADA2  | 11510552               | 2539                       |
| DADA2          | 12048048               | 2591                       |
| LotuS2-DADA2   | 12935664               | 999                        |
| LotuS2-UNOISE3 | 3698064                | 766                        |
| LotuS2-UPARSE  | 12995784               | 742                        |
| LotuS2-VSEARCH | 2778696                | 1464                       |
| LotuS1-UPARSE  | 1305288                | 514                        |

  

| <b>Soil-16S</b> |                        |                            |
|-----------------|------------------------|----------------------------|
|                 | <b>Number of reads</b> | <b>Number of OTUs/ASVs</b> |
| QIIME 2-Deblur  | 1157357                | 19641                      |
| QIIME 2-DADA2   | 2278731                | 25229                      |
| DADA2           | 4526920                | 49111                      |
| LotuS2-DADA2    | 2710629                | 19568                      |
| LotuS2-UNOISE3  | 2448475                | 19217                      |
| LotuS2-UPARSE   | 2637572                | 8789                       |
| LotuS2-VSEARCH  | 2678716                | 9250                       |
| LotuS1-UPARSE   | 749449                 | 5987                       |

  

| <b>Soil-ITS</b> |                        |                            |
|-----------------|------------------------|----------------------------|
|                 | <b>Number of reads</b> | <b>Number of OTUs/ASVs</b> |
| QIIME 2-DADA2   | 4962260                | 2203                       |
| DADA2           | 1742895                | 3368                       |
| LotuS2-UPARSE   | 4805387                | 1046                       |
| LotuS2-VSEARCH  | 4829288                | 920                        |
| LotuS2-CDHIT    | 2678716                | 1008                       |

883

884 **Supp. Table 1: Read counts and number of OTUs/ASVs in the OTU/ASV matrix of each**  
885 **pipeline.**

886

887 **Supp. Table 2: Significance of differences between each pipeline in the reproducibility of**  
888 **beta diversity between the technical replicates**

889 Significance of differences in Bray-Curtis distance between the pipelines were calculated based  
890 on the Tukey's HSD test.

891

892

893

894

895

| Spearman Correlation |          |                         |
|----------------------|----------|-------------------------|
|                      | p.value  | correlation coefficient |
| mothur               | 1.83E-07 | 0.544018417             |
| QIIME 2-Deblur       | 1.57E-15 | 0.747912391             |
| QIIME 2-DADA2        | 3.76E-12 | 0.680648974             |
| DADA2                | 6.77E-12 | 0.674725632             |
| LotuS2-DADA2         | 3.26E-12 | 0.682064113             |
| LotuS2-VSEARCH       | 2.80E-17 | 0.776030912             |
| LotuS2-UNOISE3       | 4.99E-14 | 0.720369663             |
| LotuS2-UPARSE        | 2.80E-17 | 0.776030912             |
| LotuS2-UPARSE        | 1.32E-19 | 0.808037907             |

  

| Pearson Correlation |          |                         |
|---------------------|----------|-------------------------|
|                     | p.value  | correlation coefficient |
| mothur              | 3.99E-07 | 0.531185654             |
| QIIME 2-Deblur      | 1.99E-11 | 0.663501229             |
| QIIME 2-DADA2       | 3.91E-09 | 0.600486282             |
| DADA2               | 7.72E-12 | 0.673389135             |
| LotuS2-DADA2        | 6.62E-05 | 0.43083946              |
| LotuS2-VSEARCH      | 2.68E-09 | 0.605505625             |
| LotuS2-UNOISE3      | 1.22E-08 | 0.584843731             |
| LotuS2-UPARSE       | 2.68E-09 | 0.605505625             |
| LotuS1-UPARSE       | 1.63E-09 | 0.611973422             |

  

| BCd to the mock community |          |
|---------------------------|----------|
|                           | BCd      |
| mothur                    | 0.430087 |
| QIIME 2-Deblur            | 0.340823 |
| QIIME 2-DADA2             | 0.373356 |
| DADA2                     | 0.327616 |
| LotuS2-DADA2              | 0.35983  |
| LotuS2-VSEARCH            | 0.324378 |
| LotuS2-UNOISE3            | 0.34578  |
| LotuS2-UPARSE             | 0.324378 |
| LotuS1-UPARSE             | 0.324448 |

896  
897  
898  
899  
900  
901  
902  
903

**Supp. Table 3: Correlation and beta distance between the mock community and re-constructed mock community by each pipeline**

**A-B)** Spearman and Pearson correlation between the expected abundances in the mock community and the observed abundances by each pipeline. **C)** Bray-Curtis dissimilarity between the known mock community and re-constructed mock community composition by each pipeline.

|                | Number of OTUs/ASVs | Number of reads | Fraction of reads assigned to TP taxa | TP | FP | FN | Precision | Recall   | F-score  |
|----------------|---------------------|-----------------|---------------------------------------|----|----|----|-----------|----------|----------|
| mothur         | 370                 | 144147          | 0.817443304                           | 34 | 25 | 11 | 0.576271  | 0.755556 | 0.653846 |
| QIIME 2-Deblur | 198                 | 480049          | 0.872517181                           | 38 | 13 | 7  | 0.745098  | 0.844444 | 0.791667 |
| QIIME 2-DADA2  | 122                 | 454082          | 0.882792095                           | 36 | 19 | 9  | 0.654545  | 0.8      | 0.72     |
| DADA2          | 94                  | 536901          | 0.922646819                           | 39 | 24 | 6  | 0.619048  | 0.866667 | 0.722222 |
| LotuS2-DADA2   | 61                  | 497970          | 0.867775167                           | 38 | 9  | 7  | 0.808511  | 0.844444 | 0.826087 |
| LotuS2-VSEARCH | 53                  | 494122          | 0.979268278                           | 39 | 9  | 6  | 0.8125    | 0.866667 | 0.83871  |
| LotuS2-UNOISE3 | 60                  | 423292          | 0.975794487                           | 38 | 9  | 7  | 0.808511  | 0.844444 | 0.826087 |
| LotuS2-UPARSE  | 53                  | 494122          | 0.979268278                           | 39 | 9  | 6  | 0.8125    | 0.866667 | 0.83871  |
| LotuS1-UPARSE  | 66                  | 148959          | 0.979202331                           | 41 | 16 | 4  | 0.719298  | 0.911111 | 0.803922 |

904  
905  
906  
907  
908

**Supp. Table 4: Accuracy of each pipeline in re-constructing the mock community at genus level**

909

**Supplementary Information:**

**Influence of dereplication thresholds, non-default parameters and read truncation**

912 Dereplication is the pre-clustering of sequencing reads at 100% nucleotide identity, a commonly  
913 used strategy to reduce the computational complexity of sequence clustering [17]. Further,  
914 dereplication can be used to filter out sparsely occurring reads that could represent technical  
915 artifacts, unlikely to represent true biodiversity. Therefore, LotuS2 uses a “dereplication” filter,  
916 that can be user defined.

917 Overall, this filter does not mostly change the number of OTU/ASV counts, with more  
918 OTUs/ASVs being recovered when the filter is more relaxed (**Supp. Figure 2A,D,G**). This is  
919 expected because this filter is designed to remove sparse OTUs/ASVs that could both represent  
920 technical replicates as well as extremely rare microbes. However, this did not affect the overall  
921 community reproducibility of either gut- or soil-16S samples. However, in soil-ITS samples, we  
922 noted a dramatic decrease in BCd between technical replicates at stricter dereplication cut-offs  
923 (**Supp. Figure 2H-I**).

924 The number of retrieved reads remained very stable independent of filtering stringency; this is  
925 expected because the backmapping of mid-quality reads will re-introduce reads not passing the  
926 dereplication filter.

927 LotuS2 uses several default options (-lulu 1, -xtalk 0, -keepUnclassified 0 and -ITSX 1; where  
928 “1” means the option is “activated” and “0” means “deactivated”). When activated, -lulu option  
929 uses LULU R package [23] to merge OTUs/ASVs based on their co-occurrences; -xtalk option  
930 checks for cross-talk [32], -keepUnclassified includes unclassified (i.e. not matching to any  
931 taxon in the taxonomy database) OTUs/ASVs in the final matrix and -ITSx activates the ITSx  
932 program [31] to only retain OTUs fitting to ITS1/ITS2 hmm models. The impact of these  
933 parameters on the reproducibility of LotuS2 was tested (**Supp. Figure 3**). Overall, non-default  
934 options did not change the BCd between the technical replicates except -keepUnclassified 1  
935 notably increasing BCd in gut-16S, while -lulu 0 slightly increased BCd in soil-ITS.

936  
937 Read length truncation is frequently used to remove the typically low quality 3' end of reads  
938 [8,17]. This is impacting the retrieved read counts as well as observed OTU/ASV diversity. For  
939 example, at 170 bp read truncation, mothur, DADA2 and QIIME 2-DADA2 were severely  
940 impacted in merging read pairs, failing or only integrating a fraction of read pairs in gut and soil-  
941 16S datasets **Supp. Figure 4**). While LotuS2 also had slightly different read and cluster  
942 numbers with changing truncation lengths, it was more stable, because reads are merged in the  
943 seed extension step after sequence clustering on truncated, high-quality reads are completed  
944 (**Supp. Figure 4**). In shorter or longer read truncations, LotuS2 was still performing the best with  
945 the lowest BCd (**Supp. Figure 5A,C**) and Jd (**Supp. Figure 5B,D**) between technical replicates  
946 in both gut- and soil-16S datasets.

947 Taken together, the higher performance of LotuS2 in reproducibility of the dataset was  
948 independent of the dereplication parameters and read truncation length.
